# Supplementary material
Source: PubMed Central journal article supplement (PMC2888676)

# Gold(I)-Catalyzed Enantioselective Polycyclization Reactions

*Steven G. Sethofer, Timo Mayer and F. Dean Toste*

## Supporting Information

|                                                                |            |
|----------------------------------------------------------------|------------|
| <b>General Information</b>                                     | <b>S2</b>  |
| <b>General Procedure for Enantioselective Polycyclizations</b> | <b>S3</b>  |
| <b>Experimental Details</b>                                    | <b>S3</b>  |
| <b>Additional Optimization Data</b>                            | <b>S14</b> |
| <b>Chiral HPLC Data</b>                                        | <b>S16</b> |
| <b>NMR Spectra</b>                                             | <b>S20</b> |

### General Information

Unless otherwise stated, all commercial materials were used without further purification. Solvents were purchased from EM-Science and were dried by passage through activated alumina, except *meta*-xylene. Solvents used in polycyclization reactions were stored over 4 Å molecular sieves. Silver tetrafluoroborate (AgBF<sub>4</sub>), silver perchlorate (AgClO<sub>4</sub>) and silver hexafluoroantimonate (AgSbF<sub>6</sub>) were obtained from Aldrich Chemical Company and stored in the dark under an inert atmosphere. Silver salts kept under argon in a sealed vial and protected from light could be used several times before succumbing to deliquescence. Bisphosphine ligands were obtained from Solvias and Takasago. AuCl<sub>3</sub> was provided by Johnson Matthey. Chiral digold chloride complexes were prepared as previously described by previous work from this lab.<sup>1</sup> Complexes used for ligand optimization provided spectra in agreement with those previously described.<sup>2</sup> Except for the inhomogenous mixture arising in the synthesis of **2c**, small scale reactions were not stirred beyond a brief mixing upon addition of the catalyst. Thin layer chromatography (TLC) analysis of reaction mixtures was performed on Merck silica gel 60 F<sub>254</sub> TLC plates and flash chromatography was carried out on Sorbent Technologies 40-63 D 60 Å silica gel. <sup>1</sup>H and <sup>13</sup>C NMR spectra were recorded with Bruker AVQ-400, AVB-400, AV-500 or AV-600 spectrometers using either CDCl<sub>3</sub> or C<sub>6</sub>D<sub>6</sub>, and are internally referenced to residual protio solvent signals. <sup>1</sup>H NMR multiplicities are reported as follows: m = multiplet; s = singlet; d = doublet; t = triplet; q = quartet. All <sup>13</sup>C NMR spectra were obtained with proton decoupling. Enantiomeric ratios were measured by chiral HPLC employing a Shimidzu VP Series instrument equipped with SPD-M10A microdiode array detector using a Chiral PAK AD-H column.

### General Procedure for Enantioselective Polycyclizations

A mixture of AgSbF<sub>6</sub> (0.8 mg, 2.2 μmol) and the bisphosphine digold(I) chloride complex (3.32 mg, 2.22 μmol) is suspended in 300 μL of *m*-xylene in a sealed vial, and sonicated or stirred

magnetically for 15 min at room temperature). The resulting suspension is filtered through a glass microfiber plug directly into a solution of substrate (15 mg, 0.044 mmol) in 600  $\mu\text{l}$  of *m*-xylene, thorough mixing is ensured and the resulting homogenous solution is allowed stand until such time as the substrate was fully consumed as judged by TLC or  $^1\text{H}$  NMR analysis. Determination of yield was made by calibration with an internal standard (9-bromophenanthrene) prior to addition of catalyst. Upon consumption of the starting material, an aliquot containing ca. 4 mg. of crude product was concentrated under a stream of  $\text{N}_2$  until a thick oil was obtained. This was dissolved in 100  $\mu\text{L}$   $\text{C}_6\text{D}_6$  and concentrated under flowing  $\text{N}_2$  twice, providing a residual oil free from excessive *m*-xylene which was subsequently analyzed by  $^1\text{H}$  NMR. The product was isolated in analytically pure form by evaporation of the reaction mixture to a volume of ca. 100  $\mu\text{L}$  which was then eluted through a short silica column. Products **2a** and **15** provided crystals suitable for x-ray analysis, permitting assignment of the absolute stereochemistry. Notably, cyclization by the catalyst derived from (R)-DTB,MeO-Biphep(AuCl) $_2$  proceeded with the same sense of enantioselectivity in both cases. Crystallographic data provided

### Experimental Details

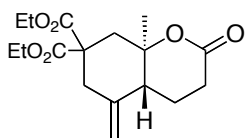

**(4R,8R)-Diethyl-8-methyl-5-methylene-2-oxohexahydro-2H-chromene-7,7(3H)-dicarboxylate (2a).** Prepared from **1a** in accord with the general

procedure for cyclization. Chromatography (1:1 hexanes : diethyl ether) provided a clear oil which was recrystallized by slow evaporation (3:2 dichloromethane : hexanes) to provide transparent crystals suitable for x-ray analysis, crystallographic data provided.  $^1\text{H}$  NMR (600 MHz,  $\text{C}_6\text{D}_6$ ):  $\delta$  7.07 (dd,  $J = 7.0, 1.4$  Hz, 2H), 6.97 (d,  $J = 7.6$  Hz, 1H), 6.87-6.85 (m, 1H), 5.16 (d,  $J = 1.0$  Hz, 1H), 4.73 (d,  $J = 1.1$  Hz, 1H), 3.97-3.83 (m, 4H), 3.38 (dd,  $J = 13.5, 2.2$  Hz, 1H), 3.16 (dd,  $J = 13.6, 2.1$  Hz, 1H), 2.74 (d,  $J = 13.7$  Hz, 1H), 2.58 (dd,  $J = 16.0, 12.8$  Hz, 1H), 2.36 (dd,  $J = 16.1, 4.6$  Hz, 1H), 2.24 (s, 1H), 1.04 (s, 3H), 0.86 (t,  $J = 8.0$  Hz, 6H).  $^{13}\text{C}$  NMR (151 MHz, C-

${}^6\text{D}_6$ ):  $\delta$  170.67, 169.91, 152.81, 142.91, 129.65, 121.06, 120.04, 117.39, 111.03, 99.96, 76.53, 61.29, 60.84, 54.51, 43.92, 43.16, 40.00, 24.38, 17.24, 13.49. **MS** HRMS (ESI) calc. for  $[\text{C}_{21}\text{H}_{27}\text{O}_5]^+$ : 359.1850, found: 358.1853. **HPLC** (95:5 hexanes : isopropanol, 0.7 mL/min,  $\lambda_{\text{max}}$  = 205 nm).  $t_{\text{R}}$  27.58 min (major), 25.31 (minor): 91% *ee*.

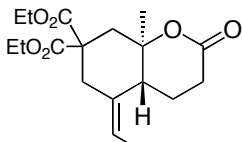

**(4R,8R,Z)-diethyl-5-ethylidene-8a-methyl-2-oxohexahydro-2H-chromene-7,7(3H)-dicarboxylate (2b)**. Prepared from **1b** in accord with the general procedure for cyclization. Flash chromatography (1:1

hexanes : diethyl ether) provided the lactone as a clear oil.  **${}^1\text{H-NMR}$**  (600 MHz,  $\text{C}_6\text{D}_6$ ):  $\delta$  5.55 (t,  $J$  = 7.0 Hz, 1H), 5.30 (td,  $J$  = 7.0, 1.2 Hz, 1H), 5.27 (d,  $J$  = 6.9 Hz, 1H), 4.04-3.93 (m, 4H), 3.38 (s, 5H), 3.23 (s, 2H), 3.14 (d,  $J$  = 2.7 Hz, 2H), 2.63 (dt,  $J$  = 16.8, 8.2 Hz, 2H), 2.10 (q,  $J$  = 7.3 Hz, 2H), 2.04 (t,  $J$  = 7.5 Hz, 2H), 1.77 (dt,  $J$  = 5.4, 2.7 Hz, 1H), 1.61 (s, 3H), 1.52 (s, 3H), 0.93 (t,  $J$  = 7.1 Hz, 6H).  **${}^{13}\text{C-NMR}$**  (150 MHz,  $\text{C}_6\text{D}_6$ ):  $\delta$  170.59, 169.81, 167.36, 131.57, 124.38, 82.75, 61.50, 60.91, 55.01, 48.10, 43.88, 43.61, 30.73, 21.35, 21.22, 13.61, 13.24. **MS** HRMS (ESI) calc. for  $[\text{C}_{18}\text{H}_{27}\text{O}_6]^+$ : 339.1802, found: 339.1809. **HPLC** (95:5 hexanes : isopropanol, 0.4 mL/min,  $\lambda_{\text{ax}}$  = 205 nm).  $t_{\text{R}}$  26.86 min (major), 25.46 min (minor): 92% *ee*.

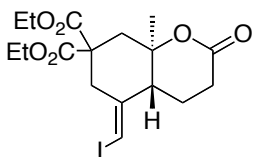

**(4R,8R,E)-diethyl-5-(iodomethylene)-8a-methyl-2-oxohexahydro-2H-chromene-7,7(3H)-dicarboxylate (2c)**. Prepared from **1a** in accord with the general procedure for cyclization with the following

modification: Immediately before the addition of catalyst, 2.1 equivalents of N-iodosuccinimide were added at  $-40^\circ\text{C}$ , and this temperature was maintained for 18 hours. Purified by flash chromatography (1:1 hexanes : diethyl ether) to provide the lactone as a slightly tan oil.  **${}^1\text{H-NMR}$**  (400 MHz,  $\text{CDCl}_3$ ):  $\delta$  5.29-5.26 (m, 1H), 4.16 (qq,  $J$  = 10.1, 7.0 Hz, 4H), 2.75 (s, 2H), 2.68 (d,  $J$  = 2.5 Hz, 2H), 2.36-2.29 (m, 4H), 1.74 (t,  $J$  = 2.5 Hz, 3H), 1.23 (d,  $J$  = 14.2 Hz, 6H).  **${}^{13}\text{C-NMR}$**  (100 MHz,  $\text{CDCl}_3$ ):  $\delta$  170.36, 170.34, 169.50, 143.95, 82.27, 78.29, 62.47, 62.04, 54.51, 47.77, 43.02, 40.54, 29.14, 21.00, 19.09, 14.21, 14.11. **MS** HRMS (EI) calc. for  $[\text{C}_{17}\text{H}_{23}\text{O}_6\text{I}]^+$ : 473.0432, found:

473.0438. **HPLC** (95:5 hexanes : isopropanol, 0.4 mL/min,  $\lambda_{\text{ax}}=225$  nm).  $t_{\text{R}}$  65.14 min (major), 59.83 min (minor): 96 % *ee*.

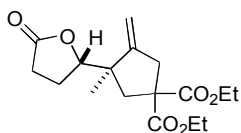

**(R)-diethyl 3-methyl-4-methylene-3-((S)-5-oxotetrahydrofuran-2-yl)cyclopentane-1,1-dicarboxylate (3)**. Prepared from **1** in accord with the general procedure for cyclization, isolated by flash chromatography (2:3 diethyl ether : hexanes) as a minor product along with **2a**. Analytically pure

material was obtained from the cyclization of triester **10**, providing **3** as the major isolable product along with **1** as further purified by trituration with cold pentane isolation of the supernate. **<sup>1</sup>H-NMR** (500 MHz, CDCl<sub>3</sub>):  $\delta$  4.93 (t,  $J = 2.0$  Hz, 1H), 4.73 (dd,  $J = 2.6, 1.6$  Hz, 1H), 4.03-3.92 (m, 4H), 3.73 (t,  $J = 7.9$  Hz, 1H), 3.21 (t,  $J = 2.6$  Hz, 1H), 3.20 (d,  $J = 1.3$  Hz, 1H), 2.59 (d,  $J = 14.0$  Hz, 1H), 2.44 (dd,  $J = 14.0, 1.1$  Hz, 1H), 1.90-1.84 (m, 1H), 1.72 (dt,  $J = 17.4, 10.3$  Hz, 1H), 1.20-1.14 (m, 3H), 0.94-0.89 (m, 11H). **<sup>13</sup>C-NMR** (125 MHz, CDCl<sub>3</sub>):  $\delta$  175.73, 172.20, 171.84, 154.60, 108.52, 85.63, 62.19, 61.99, 58.57, 48.37, 43.38, 42.76, 29.33, 24.33, 23.52, 14.45, 14.45. **MS** HRMS (ESI) calc. for [C<sub>17</sub>H<sub>24</sub>O<sub>6</sub>Na]<sup>+</sup>: 347.1465, found: 347.1463.

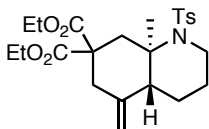

**(4R,8R)-diethyl-8a-methyl-5-methylene-1-tosyloctahydroquinoline-7,7(1H)-dicarboxylate (5)**. Prepared from **4** in accord with the general procedure for cyclization. Purified by flash chromatography (1:1 hexanes :

diethyl ether), providing the title compound as a clear oil. **<sup>1</sup>H-NMR** (500 MHz, C<sub>6</sub>D<sub>6</sub>):  $\delta$  7.87 (d,  $J = 8.3$  Hz, 2H), 6.84 (d,  $J = 7.9$  Hz, 2H), 5.13 (d,  $J = 1.3$  Hz, 1H), 4.59 (d,  $J = 1.5$  Hz, 1H), 4.06 (dt,  $J = 13.1, 3.5$  Hz, 1H), 4.03-3.80 (m, 5H), 3.33 (dd,  $J = 13.3, 1.9$  Hz, 1H), 2.90 (td,  $J = 12.5, 3.6$  Hz, 1H), 2.71 (d,  $J = 14.0$  Hz, 1H), 2.13 (d,  $J = 13.4$  Hz, 1H), 1.87-1.84 (m, 4H), 1.37-1.25 (m, 2H), 1.20-1.16 (m, 1H), 1.07 (q,  $J = 6.0$  Hz, 4H), 0.95 (t,  $J = 7.1$  Hz, 3H), 0.84 (t,  $J = 7.1$  Hz, 3 H). **<sup>13</sup>C-NMR** (100 MHz, C<sub>6</sub>D<sub>6</sub>):  $\delta$  178.83, 171.49, 171.21, 143.69, 143.12, 140.47, 129.80, 127.40, 112.64, 63.64, 62.11, 61.63, 55.14, 50.42, 43.66, 41.98, 40.27, 25.76, 22.52, 21.86, 14.67, 14.31, 14.22. **MS** HRMS (ESI) calc. for [C<sub>24</sub>H<sub>34</sub>NO<sub>6</sub>S]<sup>+</sup> : 464.2101, found:

464.2105. **HPLC** (95:5 hexanes : isopropanol, 1 mL/min,  $\lambda_{\max}$ = 206 nm).  $t_R$  min 20.26 (major), 15.71 min (minor): 90% ee.

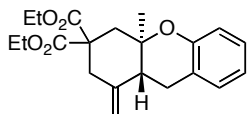

**(4R,9R)-diethyl 4-methyl-1-methylene-4,4,9,9-tetrahydro-1H-xanthene-3,3(2H)-dicarboxylate (7a)**. Prepared from **6a** in accord with the general

procedure for cyclization. Purified by flash chromatography (4:1 hexanes : diethyl ether), providing the title compound as a clear oil.  **$^1\text{H NMR}$**   $\delta$  (600 MHz,  $\text{C}_6\text{H}_6$ ):  $\delta$  7.09-7.02 (m, 2H), 6.97 (d,  $J$  = 7.6 Hz, 1H), 6.86 (td,  $J$  = 6.9, 2.6 Hz, 1H), 5.16 (d,  $J$  = 1.0 Hz, 1H), 4.73 (d,  $J$  = 1.1 Hz, 1H), 3.98-3.82 (m, 4H), 3.38 (dd,  $J$  = 13.5, 2.2 Hz, 1H), 3.16 (dd,  $J$  = 13.6, 2.1 Hz, 1H), 2.74 (d,  $J$  = 13.7 Hz, 1H), 2.58 (dd,  $J$  = 16.0, 12.8 Hz, 1H), 2.36 (dd,  $J$  = 16.1, 4.6 Hz, 1H), 2.23 (d,  $J$  = 13.5 Hz, 1H), 2.09-2.06 (m, 1H), 1.04 (s, 3H), 0.86 (t,  $J$  = 8.0 Hz, 6H).  **$^{13}\text{C-NMR}$**  (150 MHz,  $\text{CDCl}_3$ ):  $\delta$  170.67, 169.91, 152.81, 142.91, 129.65, 121.06, 120.04, 117.39, 111.03, 99.96, 76.53, 61.29, 60.84, 54.51, 43.92, 43.16, 40.00, 24.38, 17.24, 13.53, 13.49. **MS** HRMS (ESI) calc. for  $[\text{C}_{20}\text{H}_{28}\text{O}_6]^+$  : 0, found: 0. **HPLC** Chiralpak AD-H column (98:2 hexanes : ethanol, 0.5 mL/min)  $t_R$  19.84 min (major), 14.95 min (minor): 92% ee.

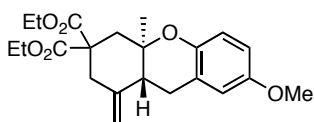

**(4R,9R)-diethyl 7-methoxy-4-methyl-1-methylene-4,4,9,9-tetrahydro-1H-xanthene-3,3(2H)-**

**dicarboxylate (7b)**. Prepared from **6b** in accord with the general procedure for cyclization. (4:1 hexanes : diethyl ether), providing the title compound as a clear oil.  **$^1\text{H-NMR}$**  (400 MHz,  $\text{CDCl}_3$ ):  $\delta$  6.75-6.69 (m, 2H), 6.65 (d,  $J$  = 2.4 Hz, 1H), 5.16 (s, 1H), 4.91 (s, 1H), 4.26-4.10 (m, 4H), 3.75 (s, 3H), 3.20 (dd,  $J$  = 13.7, 2.1 Hz, 1H), 2.81-2.73 (m, 2H), 2.65 (dd,  $J$  = 16.3, 4.8 Hz, 1H), 2.45 (d,  $J$  = 13.7 Hz, 1H), 2.38 (dd,  $J$  = 12.1, 4.5 Hz, 1H), 2.32 (d,  $J$  = 13.7 Hz, 1H), 1.26 (td,  $J$  = 7.1, 3.4 Hz, 7H), 0.92 (s, 3H).  **$^{13}\text{C-NMR}$**  (100 MHz,  $\text{CDCl}_3$ ):  $\delta$  171.05, 170.56, 153.15, 146.31, 142.73, 121.66, 117.73, 114.09, 113.68, 111.48, 76.38, 61.90, 61.40, 55.67, 54.53, 44.13, 42.75, 40.00, 24.80, 17.06, 14.01, 13.92. **MS** HRMS (ESI) calc. for  $[\text{C}_{22}\text{H}_{28}\text{O}_6\text{Na}]^+$ : 411.1778, found: 411.1782.

**HPLC** (98:2 hexanes : ethanol, 0.5 mL/min,  $\lambda_{\max}$  = 226)  $t_r$  18.62 min (major), 16.40 min (minor):

93% *ee*

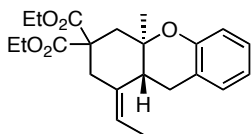

**(4*R*,9*R*,*Z*)-diethyl 1-ethylidene-4-methyl-4,4,9,9-tetrahydro-1*H*-**

**xanthene-3,3(2*H*)-dicarboxylate (7c).** Prepared from **6c** in accord with the general procedure for cyclization. Purified by flash chromatography

(4:1 hexanes : diethyl ether), providing the title compound as a clear oil. **<sup>1</sup>H-NMR** (600 MHz, C<sub>6</sub>D<sub>6</sub>)  $\delta$  7.06 (dt,  $J$  = 18.8, 8.8 Hz, 2H), 6.95 (d,  $J$  = 7.5 Hz, 1H), 6.85 (t,  $J$  = 7.3 Hz, 1H), 5.69 (q,  $J$  = 7.4 Hz, 1H), 4.00 (dq,  $J$  = 10.8, 7.1 Hz, 1H), 3.94-3.84 (m, 3H), 3.19 (ddd,  $J$  = 13.3, 8.1, 1.7 Hz, 2H), 3.14 (d,  $J$  = 14.5 Hz, 1H), 2.76-2.71 (m, 2H), 2.36 (t,  $J$  = 13.4 Hz, 2H), 1.57 (d,  $J$  = 7.4 Hz, 3H), 1.21 (s, 3H), 0.87 (dt,  $J$  = 17.9, 7.1 Hz, 6H). **<sup>13</sup>C-NMR** (100 MHz, CDCl<sub>3</sub>):  $\delta$  170.91, 170.06, 152.69, 132.02, 129.58, 124.32, 121.24, 119.84, 117.30, 77.29, 65.61, 61.31, 60.77, 55.05, 45.95, 43.80, 27.19, 18.80, 15.29, 13.62, 13.61. **MS** HRMS (EI) calc. for [C<sub>22</sub>H<sub>28</sub>O<sub>5</sub>Na]<sup>+</sup>: 395.1829, found: 395.1826. **HPLC** (99:1 hexanes : ethanol, 0.3 mL/min,  $\lambda_{\max}$  = 274 nm).  $t_r$  25.82 min (major), 30.62 min (minor): 93% *ee*

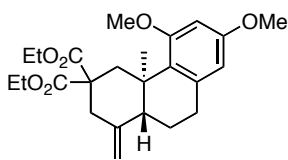

**(4*R*,10*R*)-diethyl-5,7-dimethoxy-4-methyl-1-methylene-**

**1,2,4,4,10,10-hexahydrophenanthrene-3,3(9*H*)-dicarboxylate (9).**

Prepared from **8** in accord with the general procedure for cyclization.

Purified by flash chromatography (4:1 hexanes : diethyl ether), providing the title compound as a clear oil. **<sup>1</sup>H-NMR** (600 MHz, C<sub>6</sub>D<sub>6</sub>):  $\delta$  6.32 (d,  $J$  = 2.4 Hz, 1H), 6.24 (d,  $J$  = 2.4 Hz, 1H), 5.33 (d,  $J$  = 1.1 Hz, 1H), 4.41 (dd,  $J$  = 14.1, 1.9 Hz, 1H), 4.16-4.08 (m, 2H), 3.94-3.83 (m, 2H), 3.61 (dd,  $J$  = 13.3, 1.9 Hz, 1H), 3.42 (s, 3H), 3.28 (s, 3H), 2.78-2.72 (m, 1H), 2.62 (dt,  $J$  = 16.9, 3.3 Hz, 1H), 2.45 (dd,  $J$  = 37.6, 13.8 Hz, 2H), 2.23 (t,  $J$  = 7.1 Hz, 1H), 1.65-1.61 (m, 2H), 1.34 (s, 3H), 1.05 (t,  $J$  = 7.1 Hz, 3H), 0.86 (t,  $J$  = 7.1 Hz, 3H). **<sup>13</sup>C-NMR** (100 MHz, CDCl<sub>3</sub>):  $\delta$  172.28, 172.14, 159.58, 158.08, 145.47, 137.99, 126.70, 109.94, 104.80, 97.27, 61.31, 60.86, 55.11, 54.99, 54.93, 50.44,

40.36, 39.70, 39.07, 31.89, 20.63, 17.72, 13.86, 13.84. **MS** HRMS (ESI) calc. for  $[C_{24}H_{32}O_6Na]^+$ : 439.2091, found: 439.2091. **HPLC** (99:1 hexanes : ethanol, 0.85 mL/min,  $\lambda_{max}$  = 208 nm).  $t_R$  19.216 min (major), 22.57 min (minor): 94% *ee*

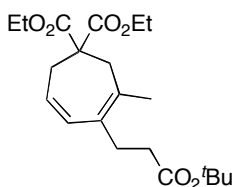

**diethyl 4-(3-tert-butoxy-3-oxopropyl)-3-methylcyclohepta-3,5-diene-1,1-dicarboxylate (11)**. Prepared from **10** in accord with the general procedure for cyclization. Purified by flash chromatography (5:1 hexanes : diethyl ether).  **$^1H$  NMR** (400 MHz,  $CDCl_3$ ):  $\delta$  6.27 (d,  $J$  = 15.6 Hz, 1H),

5.46 (dt,  $J$  = 15.0, 7.3 Hz, 1H), 3.97 (sextet,  $J$  = 6.4 Hz, 4H), 3.43 (s, 2H), 3.22 (s, 2H), 2.33 (q,  $J$  = 7.1 Hz, 2H), 2.17 (d,  $J$  = 7.4 Hz, 2H), 1.50 (s, 3H), 1.37 (d,  $J$  = 0.8 Hz, 9H), 0.91 (t,  $J$  = 7.1 Hz, 6H).  **$^{13}C$ -NMR** (150 MHz,  $C_6D_6$ ):  $\delta$  185.92, 172.11, 171.85, 132.70, 131.19, 129.19, 125.06, 79.65, 79.65, 61.37, 57.65, 46.78, 41.76, 35.53, 29.04, 28.17, 14.04, 13.33. **MS** HRMS (ESI) calc. for  $[C_{21}H_{32}O_6Na]^+$ : 403.2091, found: 403.2095.

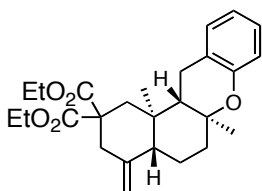

**(4*R*,6*S*,12*S*,12*R*)-diethyl-6,12*b*-dimethyl-4-methylene-3,4,4,5,6,6,12,12*a*-octahydro-1*H*-benzo[*a*]xanthene-2,2(12*bH*)-dicarboxylate (13)**. Prepared from **12** in accord with the general

procedure for cyclization. Purified by flash chromatography (4:1 hexanes : diethyl ether), providing the title compound as a clear oil.  **$^1H$  NMR** (400 MHz,  $CDCl_3$ ):  $\delta$  7.11 (t,  $J$  = 6.2 Hz, 2H), 6.86 (td,  $J$  = 7.5, 1.0 Hz, 1H), 6.81 (d,  $J$  = 8.2 Hz, 1H), 5.31 (t,  $J$  = 7.3 Hz, 2H), 5.24 (s, 1H), 4.19 (qq,  $J$  = 10.9, 7.2 Hz, 4H), 3.37 (d,  $J$  = 7.1 Hz, 1H), 2.79-2.77 (m, 4H), 2.16-2.06 (m, 4H), 1.99 (t,  $J$  = 2.7 Hz, 1H), 1.76 (s, 3H), 1.53 (s, 3H), 1.26 (t,  $J$  = 7.1 Hz, 6H).  **$^{13}C$ -NMR** (151 MHz,  $C_6D_6$ ):  $\delta$  171.52, 171.00, 153.62, 144.90, 129.78, 127.94, 121.98, 119.72, 117.16, 109.54, 76.02, 61.16, 60.81, 54.65, 51.05, 49.87, 43.10, 40.41, 39.31, 38.26, 29.82, 22.98, 21.44, 20.71, 13.60, 13.03. **MS** HRMS (ESI) calc. for  $[C_{26}H_{34}O_5Na]^+$ : 449.2298, found: 449.2300. **HPLC** (98:2:



hexanes:isopropanol, 0.6 mL/min,  $\lambda_{\text{ax}}=205$  nm).  $t_{\text{RS}}$  11.37 min (major), 16.88 min (minor). 88 % *ee*.

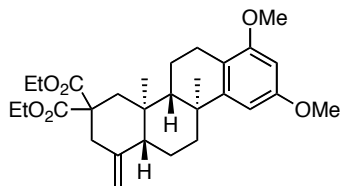

**(4*R*,4*S*,10*S*,12*R*)-diethyl-7,9-dimethoxy-4,10*b*-dimethyl-1-methylene-1,2,4,4,5,6,10*b*,11,12,12*a*-decahydrochrysen-3,3(4*H*)-dicarboxylate (15).** Prepared from **14** in accord with the

general procedure for cyclization. Purified by flash chromatography (5:1 hexanes : diethyl ether) to give a clear oil which solidified on standing. A solution of this material crystallized on slow evaporation of a solution in 3:2 MTBE : pentanes.  $^1\text{H-NMR}$  (600 MHz,  $\text{C}_6\text{D}_6$ ):  $\delta$  6.37 (d,  $J = 2.0$  Hz, 1H), 6.20 (d,  $J = 1.9$  Hz, 1H), 5.25 (s, 1H), 4.84 (s, 1H), 4.12-4.01 (m, 2H), 3.98-3.87 (m, 2H), 3.55 (d,  $J = 13.4$  Hz, 1H), 3.42 (s, 3H), 3.28 (s, 3H), 3.06 (d,  $J = 13.6$  Hz, 1H), 2.74-2.63 (m, 2H), 2.37 (d,  $J = 13.4$  Hz, 1H), 2.04 (d,  $J = 13.7$  Hz, 1H), 1.84-1.78 (m, 2H), 1.73 (qd,  $J = 12.9, 2.6$  Hz, 1H), 1.60-1.58 (m, 1H), 1.45 (s, 2H), 1.43-1.40 (m, 1H), 1.36 (t,  $J = 5.6$  Hz, 3H), 1.01 (t,  $J = 7.1$  Hz, 3H), 0.90 (t,  $J = 7.1$  Hz, 3H), 0.86 (s, 3H).  $^{13}\text{C-NMR}$  (100 MHz,  $\text{C}_6\text{D}_6$ ):  $\delta$  171.99, 171.42, 159.50, 158.33, 145.87, 138.43, 130.15, 108.88, 105.02, 97.91, 61.09, 60.79, 55.11, 54.91, 54.43, 54.25, 51.68, 43.94, 40.46, 39.59, 39.51, 36.83, 33.37, 29.87, 21.37, 21.15, 18.65, 14.53, 13.65. **MS HRMS** (ESI) calc. for  $\text{C}_{29}\text{H}_{40}\text{O}_6\text{Na}$ : 507.2717, found: 507.2708. **HPLC** (99:1 hexanes : isopropanol, 0.65 mL/min,  $\lambda_{\text{ax}}=207$  nm).  $t_{\text{R}}$  20.60 min (major), 42.16 min (minor). 96% *ee*.

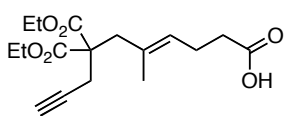

**(*E*)-7,7-bis(ethoxycarbonyl)-5-methyldec-4-en-9-ynoic acid (1a).**

$^1\text{H NMR}$  (400 MHz,  $\text{CDCl}_3$ ):  $\delta$  1.24 (t,  $J = 7.2$  Hz, 6H), 1.55–1.57 (m, 3H), 2.00–2.02 (m, 1H), 2.26–2.34 (m, 2H), 2.35–2.41 (m, 2H), 2.75 (d,  $J = 2.7$  Hz, 2H), 2.79 (s, 2H), 4.11–4.25 (m, 4H), 5.29–5.34 (m, 1H).  $^{13}\text{C-NMR}$  (100 MHz,  $\text{CDCl}_3$ ):  $\delta$  179.0, 170.2, 131.2, 128.5, 79.3, 71.6, 61.6, 56.5, 41.2, 33.7, 23.3, 22.4, 16.8, 14.0. **MS HRMS** (ESI) calc. for  $[\text{C}_{17}\text{H}_{24}\text{O}_6\text{Na}]^+$ : 347.1465, found: 347.1467.

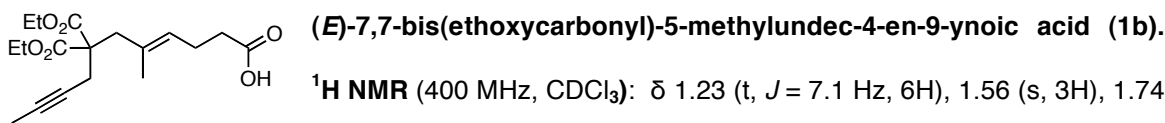

$^1\text{H NMR}$  (400 MHz,  $\text{CDCl}_3$ ):  $\delta$  1.23 (t,  $J = 7.1$  Hz, 6H), 1.56 (s, 3H), 1.74 (t,  $J = 2.6$  Hz, 3H), 2.25–2.34 (m, 2H), 2.34–2.40 (m, 2H), 2.69 (q,  $J = 2.4$  Hz, 2H), 2.76 (s, 2H), 4.10–4.23 (m, 4H), 5.28 (t,  $J = 6.5$  Hz, 1 H).  $^{13}\text{C NMR}$  (100 MHz,  $\text{CDCl}_3$ ):  $\delta$  3.4, 14.0, 16.9, 22.8, 23.3, 33.8, 41.1, 57.0, 61.4, 73.8, 79.0, 128.1, 131.5, 170.5, 179.2. **MS HRMS** (ESI) calc. for  $[\text{C}_{18}\text{H}_{26}\text{O}_6\text{Na}]^+$ : 361.1622, found: 361.1624.

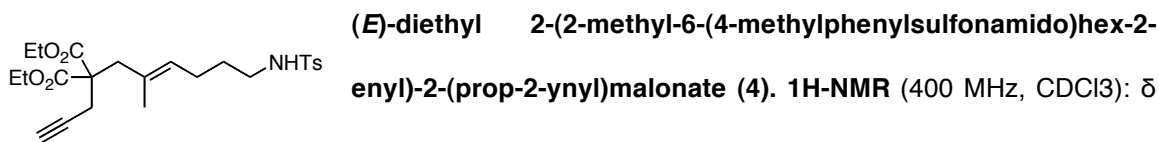

$^1\text{H-NMR}$  (400 MHz,  $\text{CDCl}_3$ ):  $\delta$  7.77–7.75 (m, 2H), 7.32 (d,  $J = 8.0$  Hz, 2H), 5.23 (t,  $J = 7.1$  Hz, 1H), 4.40 (td,  $J = 6.2, 0.3$  Hz, 1H), 4.26–4.12 (m, 4H), 2.93 (d,  $J = 6.7$  Hz, 2H), 2.77 (s, 2H), 2.72 (d,  $J = 2.7$  Hz, 2H), 2.44 (s, 3H), 2.02–1.97 (m, 3H), 1.53–1.50 (m, 5H), 1.26 (t,  $J = 7.1$  Hz, 6H).  $^{13}\text{C-NMR}$  (100 MHz,  $\text{CDCl}_3$ ):  $\delta$  170.18, 143.36, 142.23, 136.90, 130.63, 129.69, 129.33, 127.08, 79.33, 71.65, 61.59, 56.54, 42.77, 41.18, 29.39, 25.07, 22.47, 21.51, 16.86, 14.00. **MS HRMS** (ESI) calc. for  $[\text{C}_{24}\text{H}_{34}\text{NO}_6\text{S}]^+$ : 464.2101, found: 464.2103.

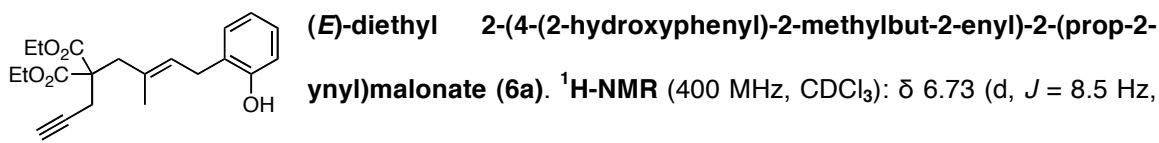

$^1\text{H-NMR}$  (400 MHz,  $\text{CDCl}_3$ ):  $\delta$  6.73 (d,  $J = 8.5$  Hz, 1H), 6.65 (td,  $J = 8.5, 3.0$  Hz, 2H), 5.48 (t,  $J = 7.0$  Hz, 1H), 3.76 (s, 3H), 3.31 (d,  $J = 7.2$  Hz, 2H), 2.87 (s, 2H), 2.81 (d,  $J = 2.6$  Hz, 2H), 2.02 (t,  $J = 2.6$  Hz, 1H), 1.70 (s, 3H), 1.23 (t,  $J = 7.1$  Hz, 6H).  $^{13}\text{C-NMR}$  (100 MHz,  $\text{CDCl}_3$ ):  $\delta$  170.20, 153.84, 131.73, 129.86, 128.21, 127.41, 126.73, 120.86, 115.65, 79.29, 71.75, 61.64, 56.84, 41.32, 29.29, 22.78, 17.16, 13.95. **MS HRMS** (ESI) calc. for  $[\text{C}_{21}\text{H}_{26}\text{O}_5\text{Na}]^+$ : 381.1672, found: 381.1676.

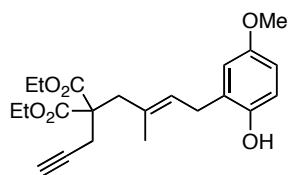

**(E)-diethyl 2-(4-(2-hydroxy-5-methoxyphenyl)-2-methylbut-2-**

**enyl)-2-(prop-2-ynyl)malonate (6b).**  $^1\text{H-NMR}$  (400 MHz,  $\text{CDCl}_3$ ):  $\delta$  7.02 (d,  $J = 8.7$  Hz, 1H), 6.68 (dt,  $J = 12.5, 4.1$  Hz, 2H), 5.51 (td,  $J =$

7.3, 1.2 Hz, 1H), 5.16 (s, 2H), 4.17 (qq,  $J = 11.3, 7.1$  Hz, 4H), 3.76 (s, 3H), 3.70 (s, 2H), 3.32 (d,  $J = 7.3$  Hz, 2H), 2.85 (s, 2H), 2.82 (d,  $J = 2.7$  Hz, 2H), 2.00 (t,  $J = 2.7$  Hz, 1H), 1.65 (t,  $J = 0.5$  Hz, 3H), 1.23 (td,  $J = 7.1, 1.1$  Hz, 10H).  $^{13}\text{C-NMR}$  (100 MHz,  $\text{CDCl}_3$ ):  $\delta$  170.28, 154.48, 149.34, 131.38, 130.60, 128.83, 115.59, 115.18, 111.56, 94.11, 79.49, 71.70, 64.13, 61.61, 56.73, 55.67, 41.42, 28.83, 22.66, 17.01, 15.19, 14.04. **MS** HRMS (ESI) calc. for  $[\text{C}_{22}\text{H}_{28}\text{O}_6\text{Na}]^+$ : 411.1778, found: 411.1774

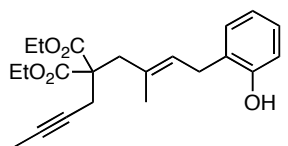

**(E)-diethyl 2-(but-2-ynyl)-2-(4-(2-hydroxyphenyl)-2-methylbut-2-**

**enyl)malonate (6c).**  $^1\text{H-NMR}$  (400 MHz,  $\text{CDCl}_3$ ):  $\delta$  6.73 (d,  $J = 8.5$  Hz,

1H), 6.65 (td,  $J = 8.5, 3.0$  Hz, 2H), 5.48 (t,  $J = 6.8$  Hz, 1H), 4.56 (s, 1H), 4.16 (qq,  $J = 12.3, 7.0$  Hz, 4H), 3.76 (s, 3H), 3.31 (d,  $J = 7.2$  Hz,

2H), 2.87 (s, 2H), 2.81 (d,  $J = 2.6$  Hz, 2H), 2.02 (t,  $J = 2.6$  Hz, 1H), 1.70 (s, 3H), 1.23 (t,  $J = 7.1$  Hz, 6H).  $^{13}\text{C-NMR}$  (101 MHz,  $\text{CDCl}_3$ ):  $\delta$  170.20, 153.84, 131.73, 129.86, 128.21, 127.41, 126.73, 120.86, 115.65, 79.29, 71.75, 61.64, 56.84, 41.32, 29.29, 22.78, 17.16, 13.95. **MS** HRMS (EI) calc. for  $[\text{C}_{22}\text{H}_{28}\text{O}_5\text{Na}]^+$ : 395.1829, found: 395.1831.

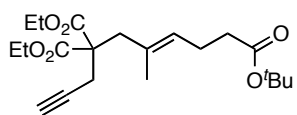

**(E)-1-tert-butyl 6,6-diethyl 4-methylnon-3-en-8-yne-1,6,6-**

**tricarboxylate (10).**  $^1\text{H-NMR}$  (400 MHz,  $\text{CDCl}_3$ ):  $\delta$  5.30 (t,  $J = 6.4$  Hz,

1H), 4.18 (qq,  $J = 10.5, 7.1$  Hz, 5H), 2.77 (d,  $J = 4.4$  Hz, 2H), 2.29-2.20 (m, 4H), 2.00 (d,  $J = 2.6$  Hz, 1H), 1.43 (s, 9H), 1.24 (t,  $J = 7.1$  Hz, 6H).  $^{13}\text{C-NMR}$  (100 MHz,  $\text{CDCl}_3$ ):  $\delta$  172.47, 170.18, 130.47, 129.18, 80.13, 79.40, 71.57, 61.54, 56.50, 41.21, 35.27, 28.06, 23.76, 22.41, 16.80, 13.99. **MS** HRMS (ESI) calc. for  $[\text{C}_{21}\text{H}_{32}\text{O}_6\text{Na}]^+$ : 403.2091, found: 403.2089.

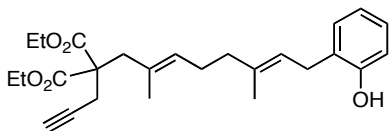

diethyl 2-((2*E*,6*E*)-8-(2-hydroxyphenyl)-2,6-dimethylocta-

2,6-dienyl)-2-(prop-2-ynyl)malonate (**12**). <sup>1</sup>H-NMR (600 MHz,

C<sub>6</sub>D<sub>6</sub>): 6.37 (d, *J* = 2.0 Hz, 1H), 6.20 (d, *J* = 1.9 Hz, 1H), 5.25 (s,

1H), 4.84 (s, 1H), 4.12-4.01 (m, 2H), 3.98-3.87 (m, 2H), 3.55 (d, *J* = 13.4 Hz, 1H), 3.42 (s, 3H),

3.28 (s, 3H), 3.06 (d, *J* = 13.6 Hz, 1H), 2.74-2.63 (m, 2H), 2.37 (d, *J* = 13.4 Hz, 1H), 2.04 (d, *J* =

13.7 Hz, 1H), 1.84-1.78 (m, 2H), 1.73 (qd, *J* = 12.9, 2.6 Hz, 1H), 1.60-1.58 (m, 1H), 1.45 (s, 2H),

1.43-1.40 (m, 1H), 1.36 (t, *J* = 5.6 Hz, 3H), 1.01 (t, *J* = 7.1 Hz, 3H), 0.90 (t, *J* = 7.1 Hz, 3H), 0.86

(s, 3H). <sup>13</sup>C-NMR (100 MHz, C<sub>6</sub>D<sub>6</sub>): δ 171.99, 171.42, 159.50, 158.33, 145.87, 138.43, 130.15,

108.88, 105.02, 97.91, 61.09, 60.79, 55.11, 54.91, 54.43, 54.25, 51.68, 43.94, 40.46, 39.59,

39.51, 36.83, 33.37, 29.87, 21.37, 21.15, 18.65, 14.53, 13.65. **MS** HRMS (ESI) calc. for

[C<sub>29</sub>H<sub>40</sub>O<sub>6</sub>Na]<sup>+</sup>: 507.2717, found: 507.2708.

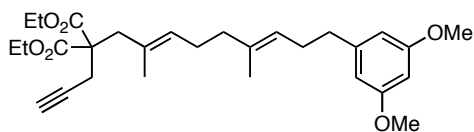

diethyl 2-((2*E*,6*E*)-9-(3,5-dimethoxyphenyl)-2,6-

dimethylnona-2,6-dienyl)-2-(prop-2-ynyl)malonate

(**14**). <sup>1</sup>H-NMR (600 MHz, C<sub>6</sub>D<sub>6</sub>): δ 6.53 (d, *J* = 2.3 Hz,

2H), 6.49 (t, *J* = 2.2 Hz, 1H), 5.56-5.54 (m, 1H), 5.30 (t, *J* = 7.1 Hz, 1H), 4.04-3.93 (m, 4H), 3.39

(d, *J* = 1.8 Hz, 1H), 3.23 (d, *J* = 2.7 Hz, 2H), 3.14 (d, *J* = 2.7 Hz, 2H), 2.64 (t, *J* = 7.8 Hz, 2H), 2.39

(q, *J* = 7.5 Hz, 2H), 2.10 (t, *J* = 7.3 Hz, 2H), 2.05-2.02 (m, 2H), 1.77 (t, *J* = 2.7 Hz, 1H), 1.67 (d, *J*

= 1.3 Hz, ), 1.61 (s, 3H), 1.53-1.50 (m, 3H), 0.93 (t, *J* = 7.1 Hz, 6H). <sup>13</sup>C-NMR (100 MHz, CDCl<sub>3</sub>):

δ 171.21, 143.42, 142.82, 140.22, 129.51, 127.12, 112.34, 63.37, 61.82, 61.34, 54.87, 50.14,

43.37, 41.71, 39.99, 25, 22.24, 21.56, 14.41, 14.02, 13.93. **MS** HRMS (ESI) calc. for

[C<sub>29</sub>H<sub>40</sub>O<sub>6</sub>Na]<sup>+</sup>: 507.2717, found: 507.2716.

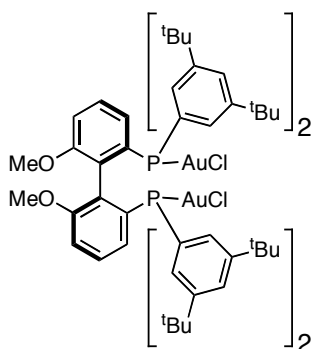

**(R)-DTB,MeO-biphep(AuCl)<sub>2</sub>**, Prepared from treatment of the commercially available ligand with AuCl, generated *in-situ* from AuCl<sub>3</sub> and thiodiglycol, as described recently by this group.<sup>1</sup> The crude product, as an oil concentrated from benzene, was recrystallized from a concentrated solution of 5% benzene in pentane, layered underneath a fivefold excess of pentane and kept at 0°C for ten days.

The crystalline material thus obtained proved suitable for x-ray analysis, crystallographic data provided. <sup>1</sup>H-NMR (400 MHz, CD<sub>2</sub>Cl<sub>2</sub>): δ 7.59 (q, *J* = 1.8 Hz, 3H), 7.55 (dd, *J* = 8.2, 2.5 Hz, 2H), 7.52 (q, *J* = 1.7 Hz, 2H), 7.41 (dd, *J* = 14.1, 1.8 Hz, 4H), 7.12 (dd, *J* = 14.2, 1.6 Hz, 4H), 6.97 (ddd, *J* = 10.7, 7.8, 0.8 Hz, 2H), 6.92 (d, *J* = 8.4 Hz, 2H), 2.61 (s, 6H), 1.26 (d, *J* = 8.5 Hz, 73H). <sup>13</sup>C-NMR (100 MHz, CD<sub>2</sub>Cl<sub>2</sub>): δ 158.96, 158.83, 151.68, 151.19, 151.08, 130.34-130.16, 129.67, 129.50, 129.45-129.40, 129.08, 128.87, 128.80, 128.72, 128.66-128.57, 128.44, 128.29, 128.25, 128.19, 128.15, 125.74, 125.27, 113.21, 34.96, 31.05. <sup>31</sup>P-NMR (162 MHz; C<sub>6</sub>D<sub>6</sub>): δ 24.96. MS HRMS (ESI) calc. for [C<sub>70</sub>H<sub>96</sub>O<sub>2</sub>Au<sub>2</sub>Cl]<sup>+</sup>: 1459.5900, found: 1459.5902.

## Additional Optimization Data

Table S1: Catalyst Optimization

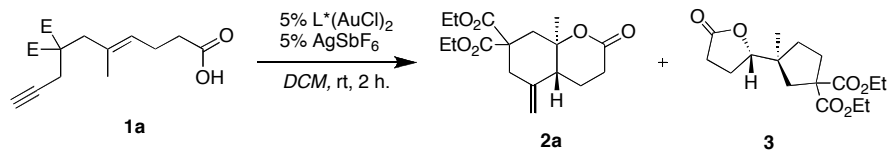

| entry | ligand                                | ee (%) | yield 2a (%) | yield 3 (%) |
|-------|---------------------------------------|--------|--------------|-------------|
| 1     | ( <i>R</i> )-DTBM-MeO-biphep          | -46    | 81           | 10          |
| 2     | ( <i>R</i> )- <i>xyl</i> -MeO-BIPHEP  | -36    | 66           | 11          |
| 3     | ( <i>R</i> )- <i>xyl</i> -BINAP       | -40    | 71           | 12          |
| 4     | ( <i>R</i> )- <i>tol</i> -BINAP       | -23    | 75           | 10          |
| 5     | ( <i>S</i> )-BINAP                    | 13     | 81           | 8           |
| 6     | ( <i>R</i> )-C <sub>3</sub> -Tunephos | 7      | 72           | 8           |
| 7     | ( <i>R</i> )-SEGPHOS                  | -3     | 88           | 6           |
| 8     | ( <i>S</i> )-Difluorphos              | -3     | 80           | -           |
| 9     | ( <i>R</i> )-DTBM-SEGPHOS             | -2     | 78           | 10          |

Table S2: Solvent Optimization

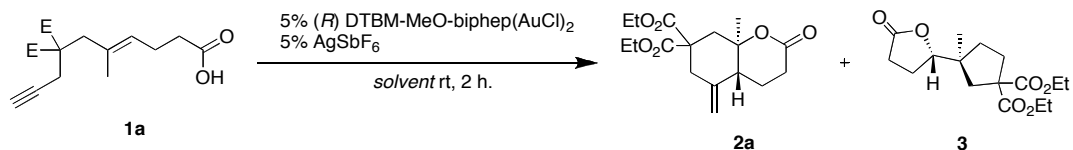

| entry | solvent          | ee (%) | yield 2a (%) | yield 3 (%) |
|-------|------------------|--------|--------------|-------------|
| 1     | DCM              | -46    | 81           | 10          |
| 2     | benzene          | -83    | 83           | 11          |
| 3     | toluene          | -85    | 81           | 11          |
| 4     | <i>m</i> -xylene | -87    | 83           | 14          |
| 5     | fluorobenzene    | -73    | 88           | 7           |
| 6     | nitromethane     | -47    | 79           | 3           |
| 7     | THF              | -58    | 83           | 13          |

## References

---

- [1] Kleinbeck, F.; Toste, F. D. *J. Am. Chem. Soc.*, **2009**, *131*, 9178
- [2] Melhado, A. D.; Luparia M.; Toste, F.D. . *J. Am. Chem. Soc.*, **2007**, *129*, 12638

## HPLC Data

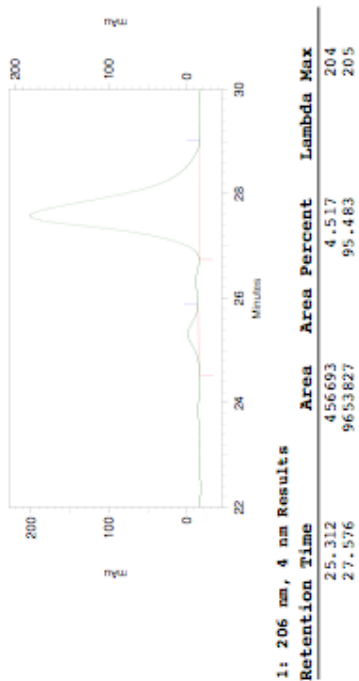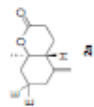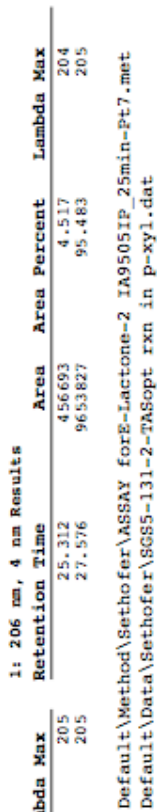

Default\Method\Sethofer\ASSAY for E-Lactone-2 IA9505IP\_25min-Pt7.met  
Default\Data\Sethofer\SGS5-131-2-TASopt rxn in p-xy1.dat

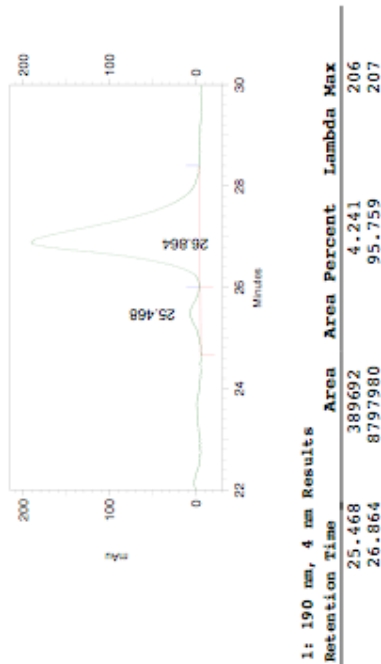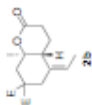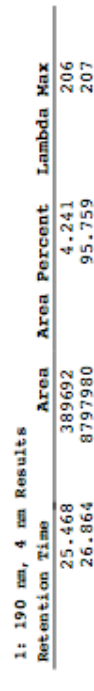

Default\Method\Sethofer\IA9505IP\_25min-tASSAY\_Me Alkyne Pt4.n  
Default\Data\Sethofer\SGS5-131-1-MTAS opt rxn.dat



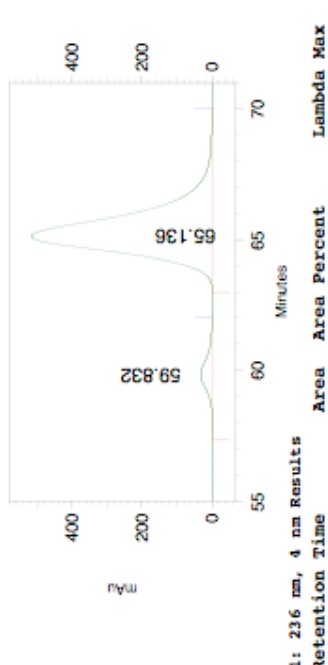

1: 236 nm, 4 nm Results

| Retention Time | Area     | Area Percent | Lambda Max |
|----------------|----------|--------------|------------|
| 59.83          | 837322   | 2.036        | 232        |
| 65.14          | 40284356 | 97.964       | 225        |

DefaultMethod:Sethofer\ASSAY for E-Lactone Internal\IA9505IP\_75min-P4.met  
 Default\Data\Sethofer\SG55-131-3-TAS.rxn with xs.NIS, rac look for assay-4.dat  
 60.116  
 65.704

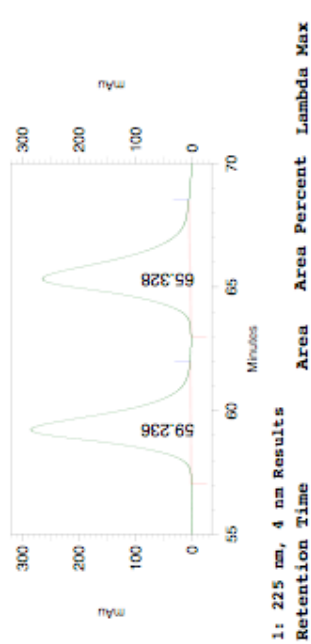

1: 225 nm, 4 nm Results

| Retention Time | Area     | Area Percent | Lambda Max |
|----------------|----------|--------------|------------|
| 59.236         | 23701724 | 48.979       | 225        |
| 65.328         | 24689862 | 51.020       | 225        |

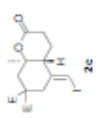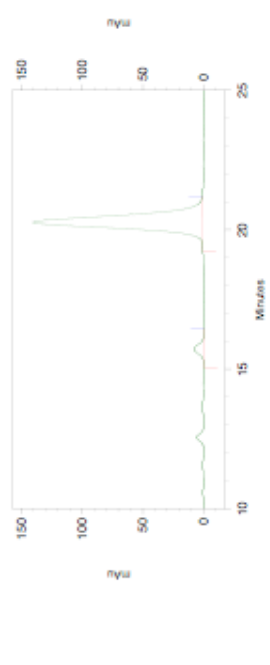

1: 207 nm, 4 nm Results

| Retention Time | Area    | Area Percent | Lambda Max |
|----------------|---------|--------------|------------|
| 15.712         | 199233  | 4.488        | 206        |
| 20.264         | 4240282 | 95.512       | 206        |

DefaultMethod:Sethofer\ASSAY for TsN IA9505IP with207nm clean\_25min.met  
 Default\Sequence\Sethofer\09082502\_TsN\_ASSAY.seq

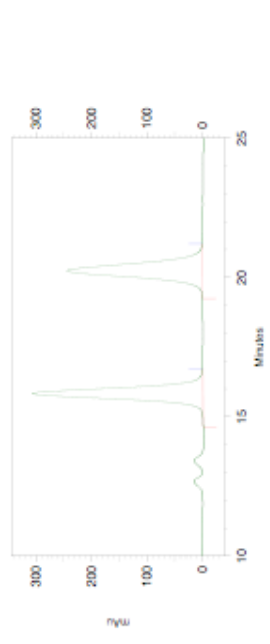

1: 207 nm, 4 nm Results

| Retention Time | Area    | Area Percent | Lambda Max |
|----------------|---------|--------------|------------|
| 15.828         | 8092698 | 50.168       | 206        |
| 20.232         | 8038556 | 49.832       | 206        |

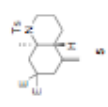

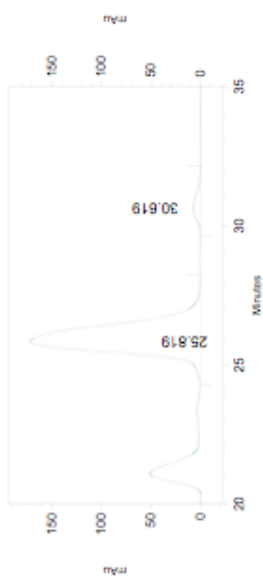

**2: 280 nm, 4 nm Results**

| Retention Time | Area     | Area Percent | Lambda Max |
|----------------|----------|--------------|------------|
| 23.619         | 11156281 | 96.404       | 274        |
| 30.619         | 416116   | 3.596        | 272        |

Default\Data\Sethofer\SGS5-24A-Rac-3  
 Default\Data\Sethofer\SGS5-24A1-3  
 Default\Method\Sethofer\MeAlk-Assay-AD9901ET-30min-pt.3.met

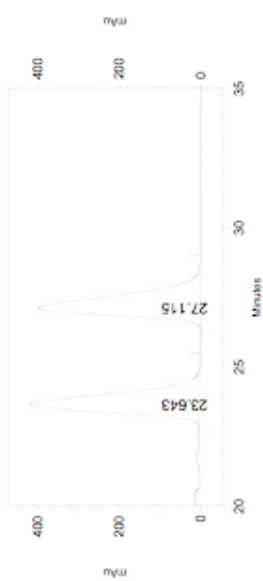

**2: 280 nm, 4 nm Results**

| Retention Time | Area     | Area Percent | Lambda Max |
|----------------|----------|--------------|------------|
| 23.643         | 18537834 | 49.290       | 274        |
| 27.115         | 19071776 | 50.710       | 274        |

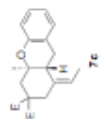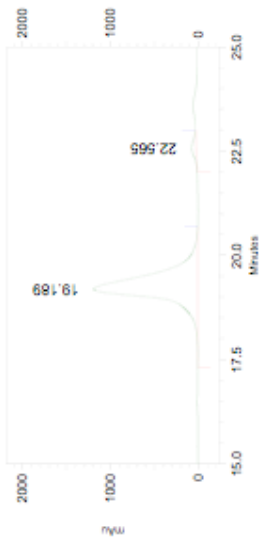

**1: 217 nm, 4 nm Results**

| Retention Time | Area     | Area Percent | Lambda Max |
|----------------|----------|--------------|------------|
| 19.189         | 35727132 | 96.895       | 208        |
| 22.565         | 1462552  | 3.185        | 208        |

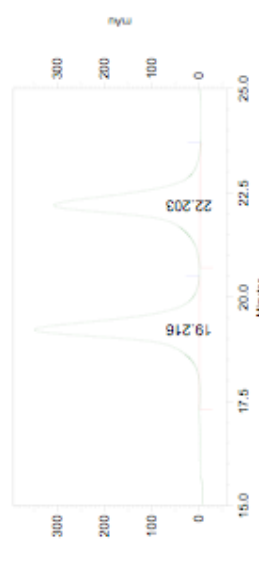

**1: 217 nm, 4 nm Results**

| Retention Time | Area     | Area Percent | Lambda Max |
|----------------|----------|--------------|------------|
| 19.216         | 11863681 | 50.198       | 208        |
| 22.203         | 11770065 | 49.802       | 208        |

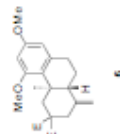

Project\sDefault\Data\Sethofer\2PCASSAY-WH9901ET\_pt85-SGS4-207  
 Project\sDefault\Method\Sethofer\ASSAY\_PC\_WH9901ET\_30min\_pt85.met

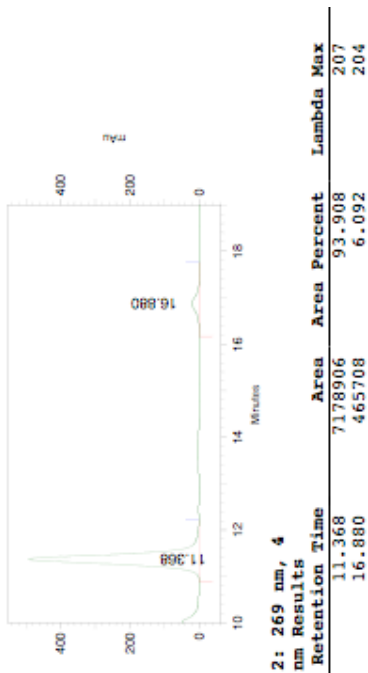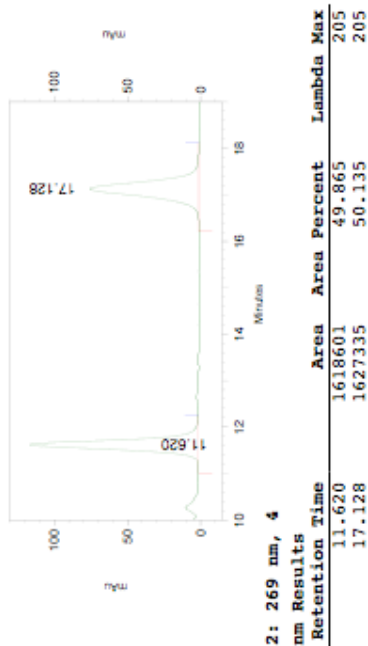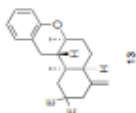

Projects(DefaultMethod)\Sethofer\A9802IP\_45min\_pt65.met  
Projects(DefaultData)\Sethofer\PYDE-A9802IP-SG55-103P16.dat

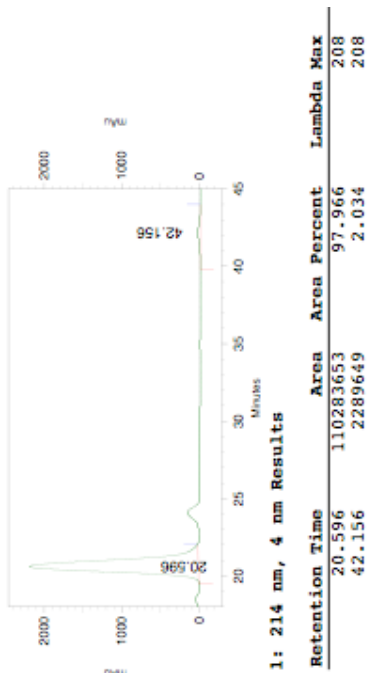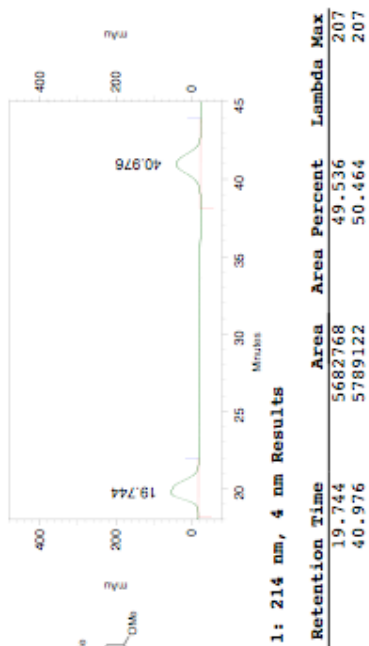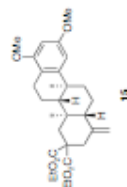

Projects(DefaultMethod)\Sethofer\A9901IP\_pt65\_ASSAY\_for\_FCD.met  
Project(DefaultData)\Sethofer\PYDE-A9802IP-SG55-103P16.datSG55-153-FCDE



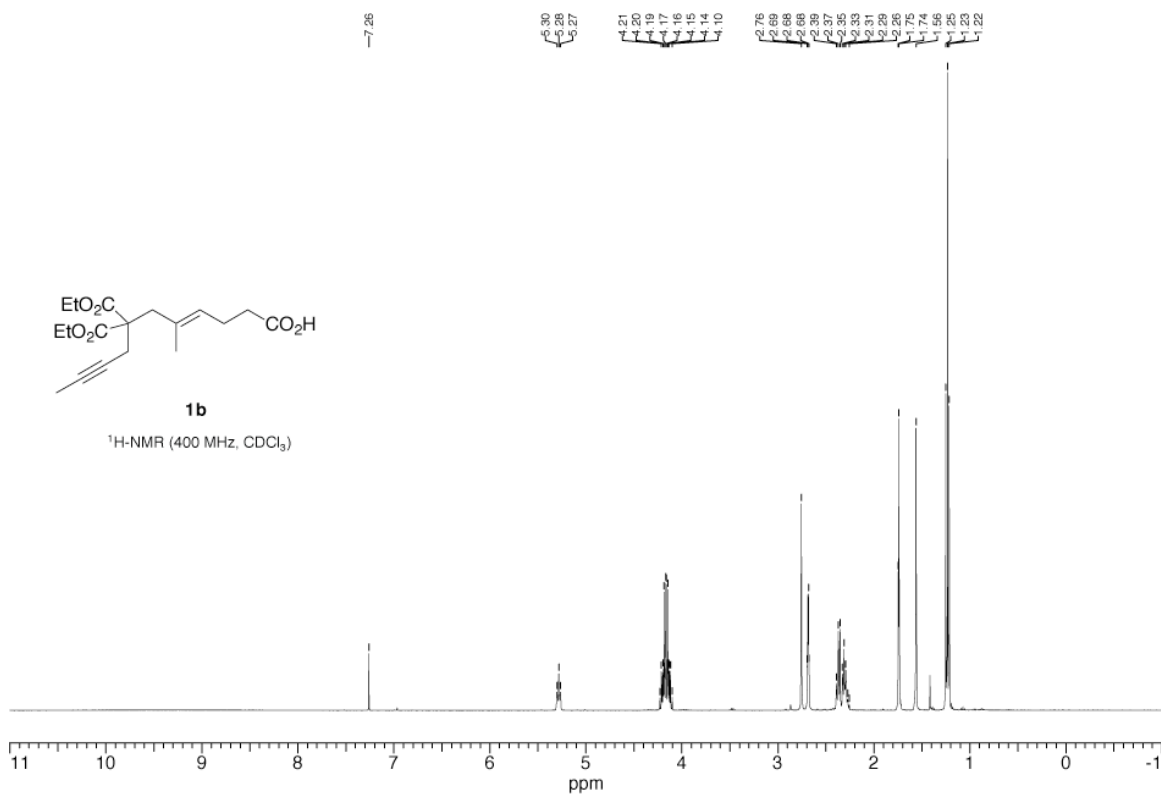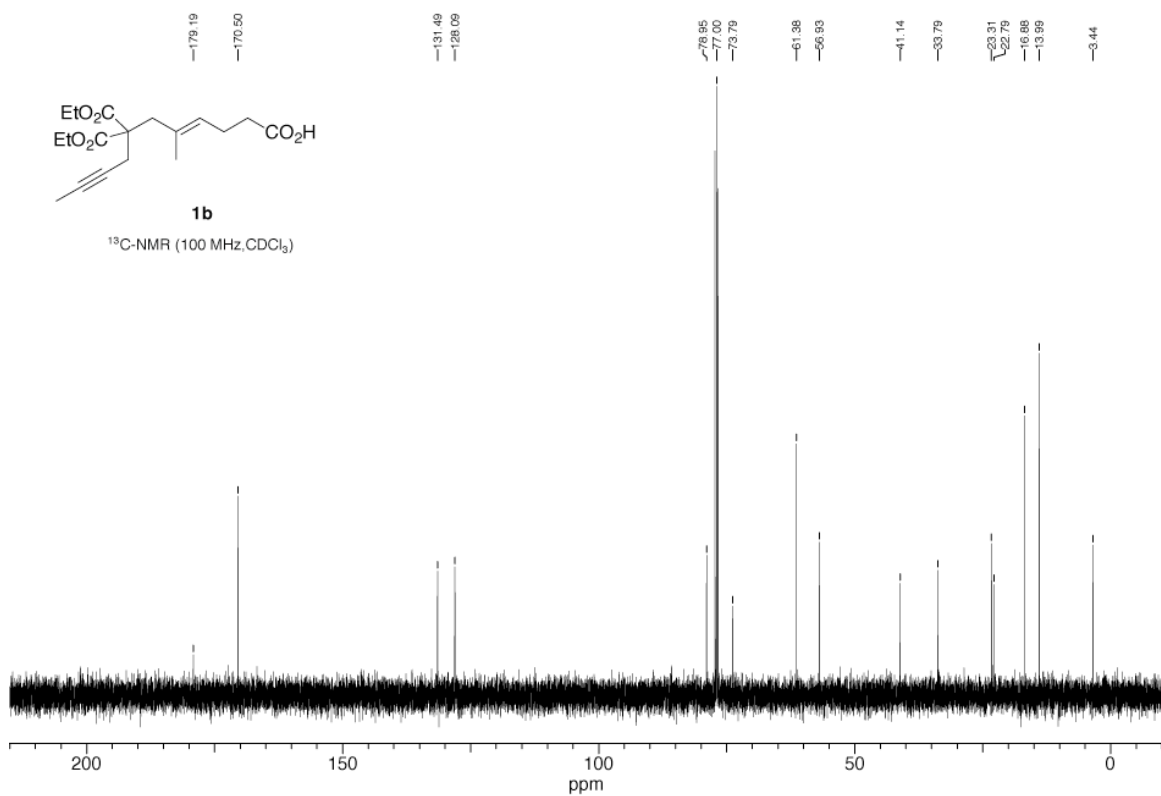

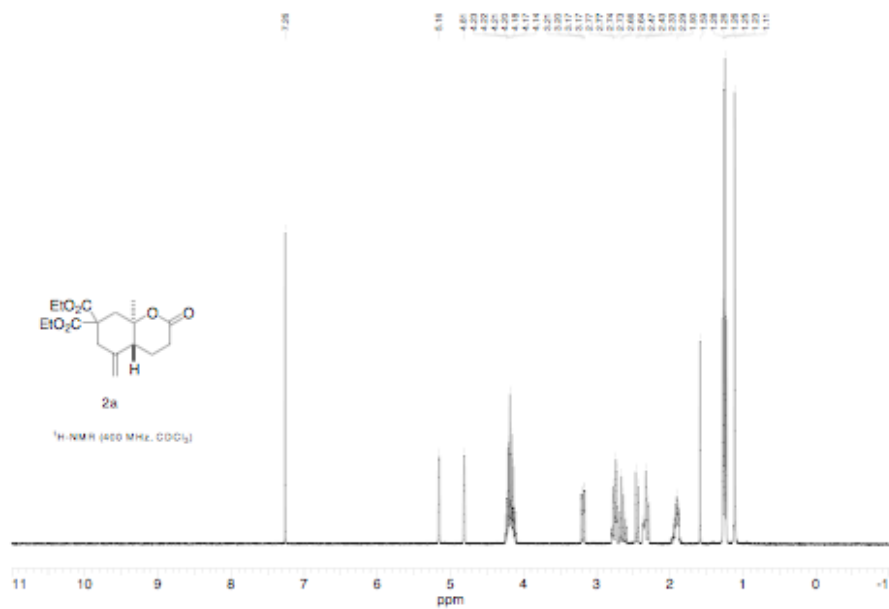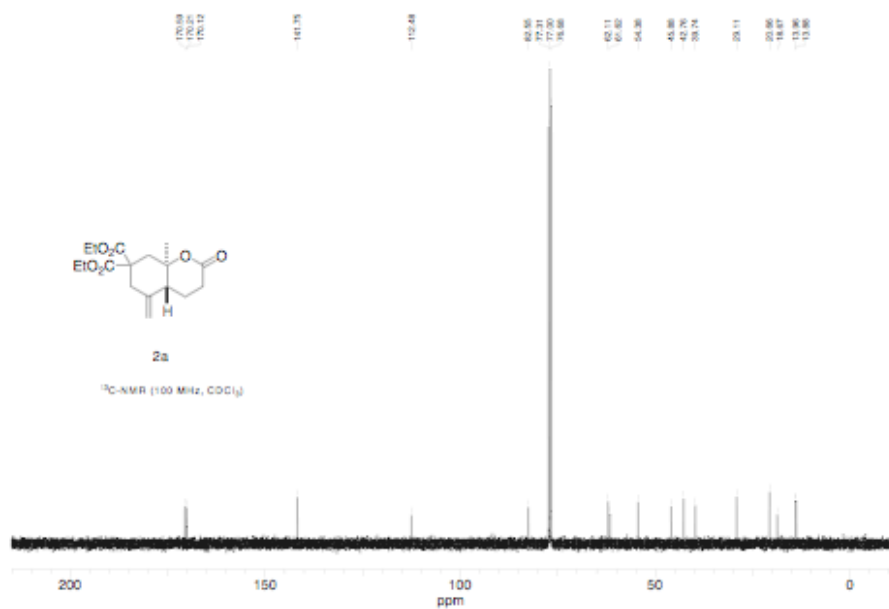

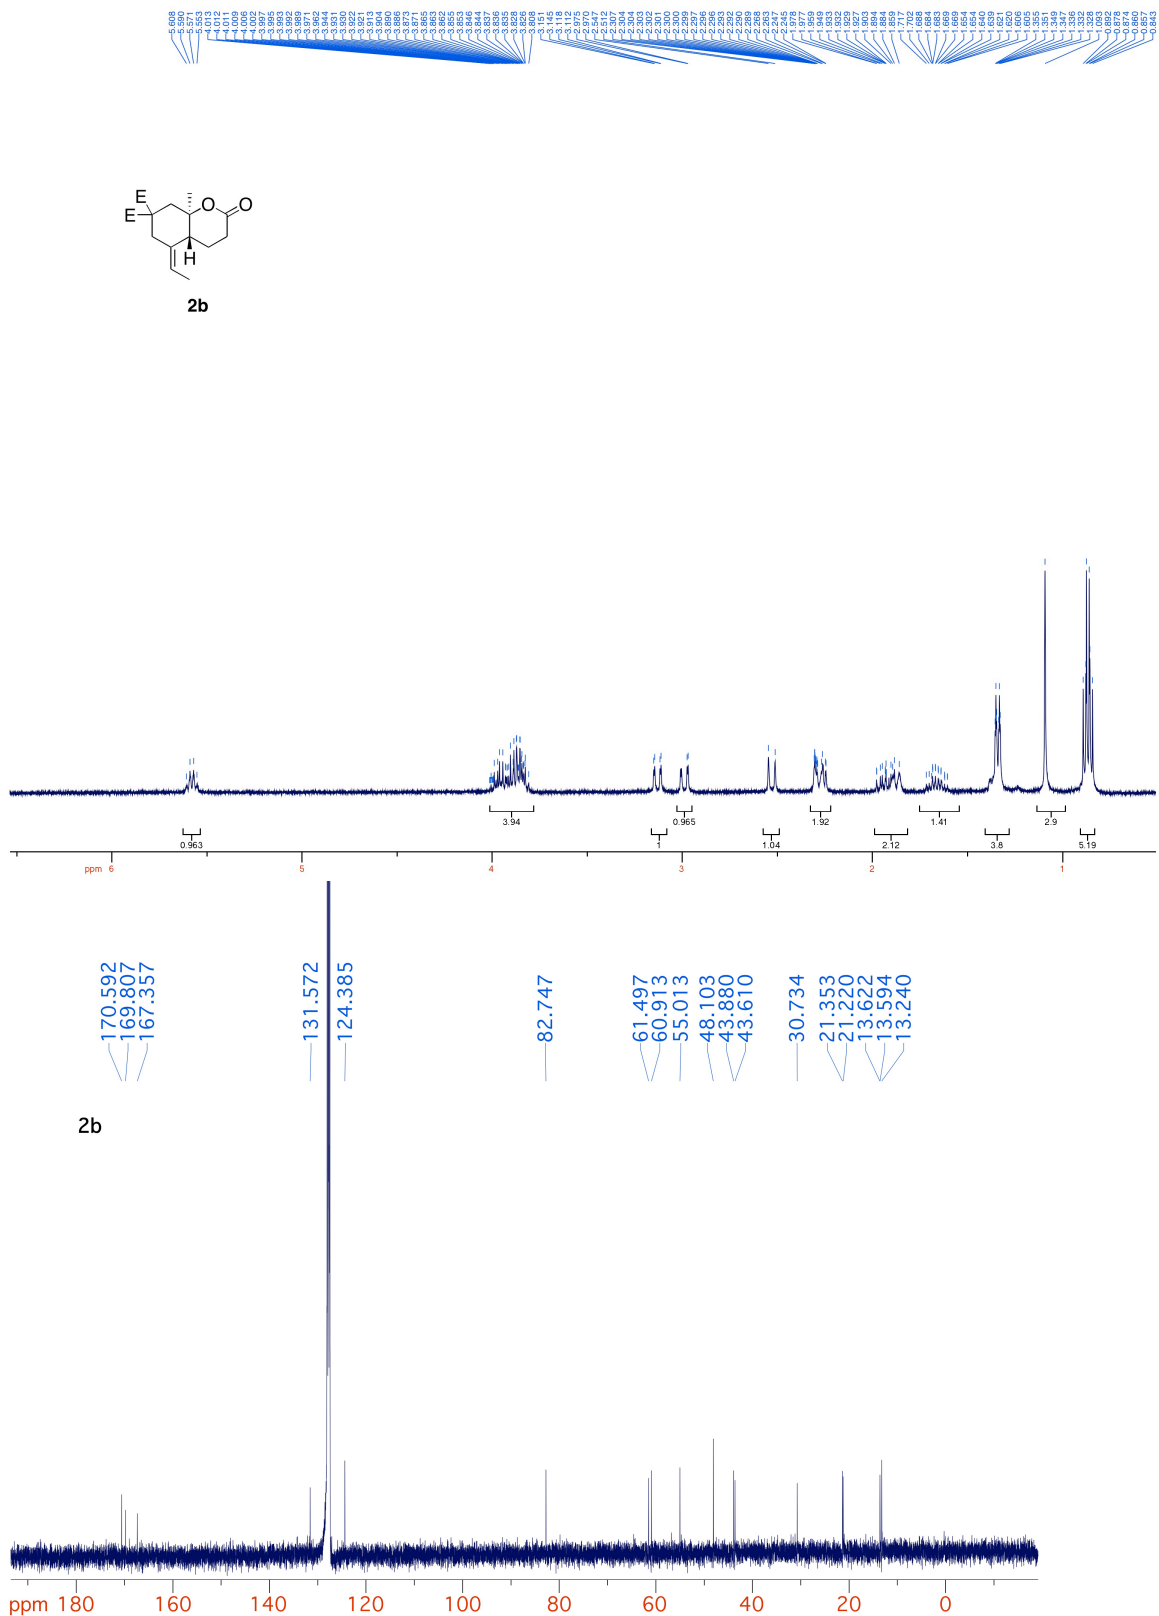

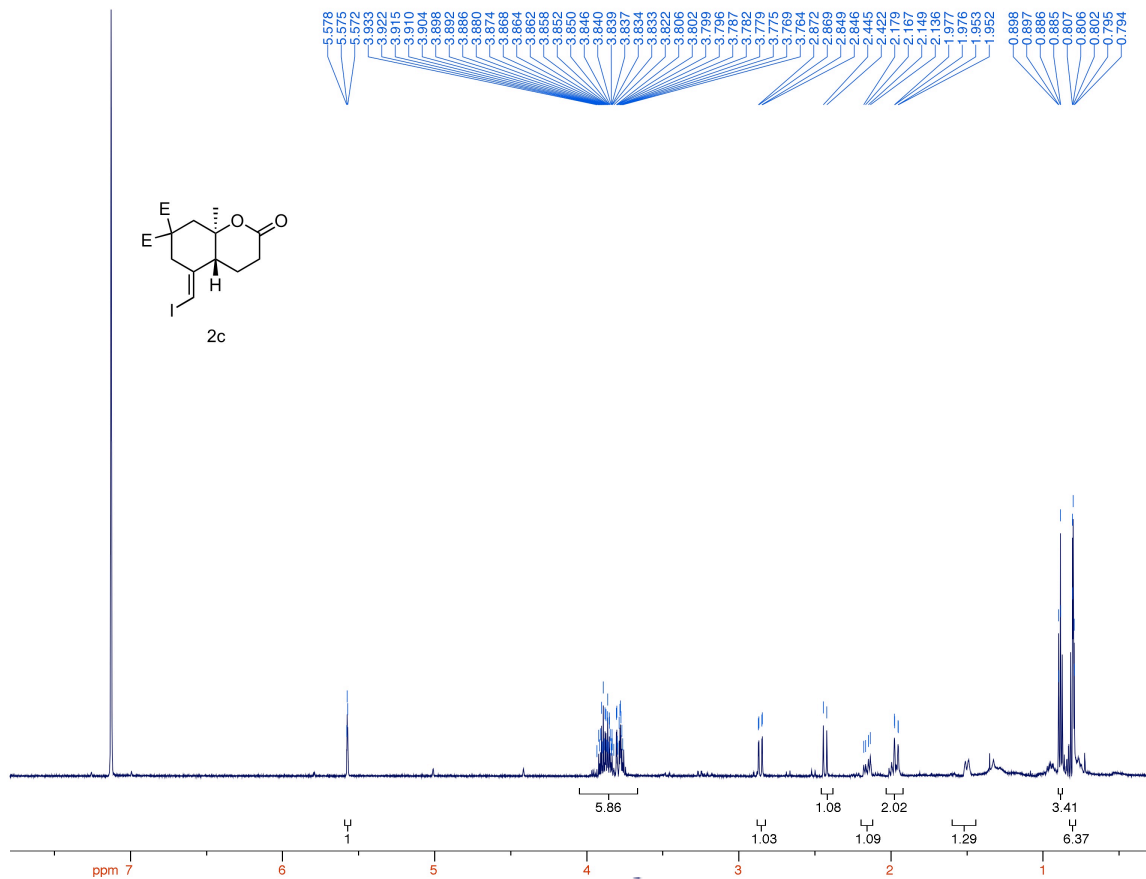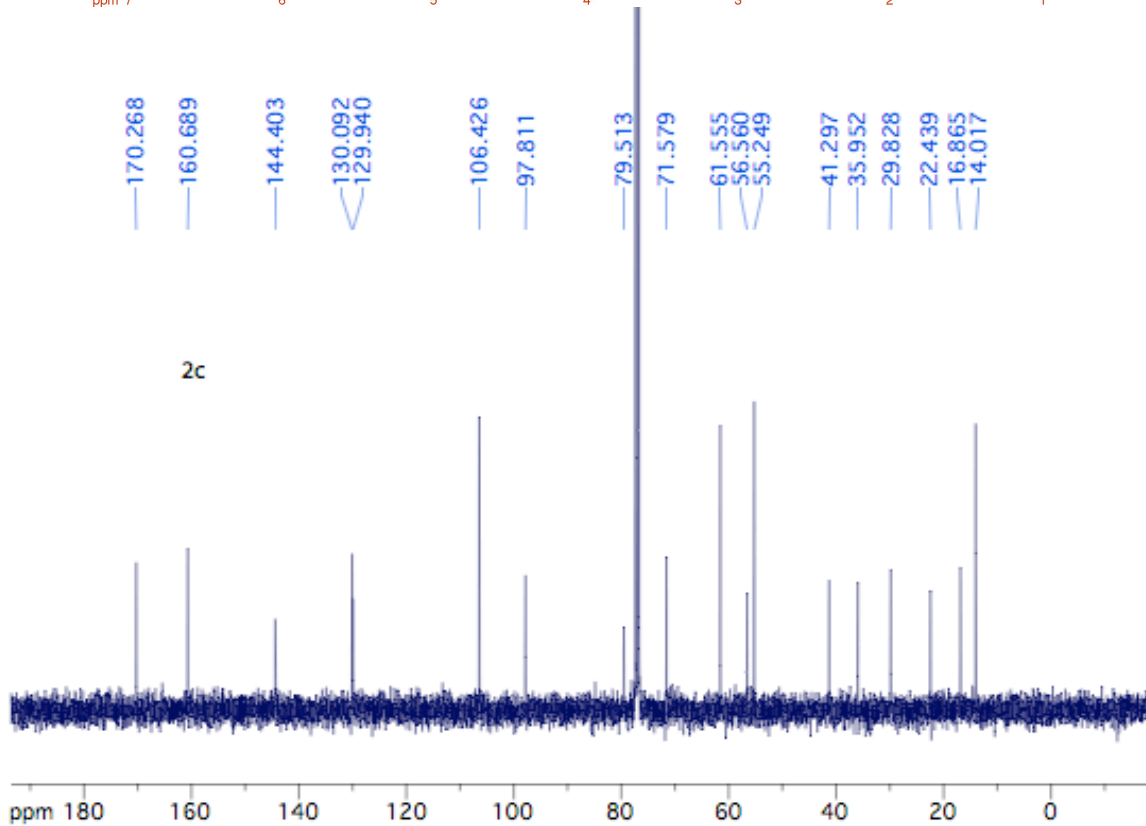



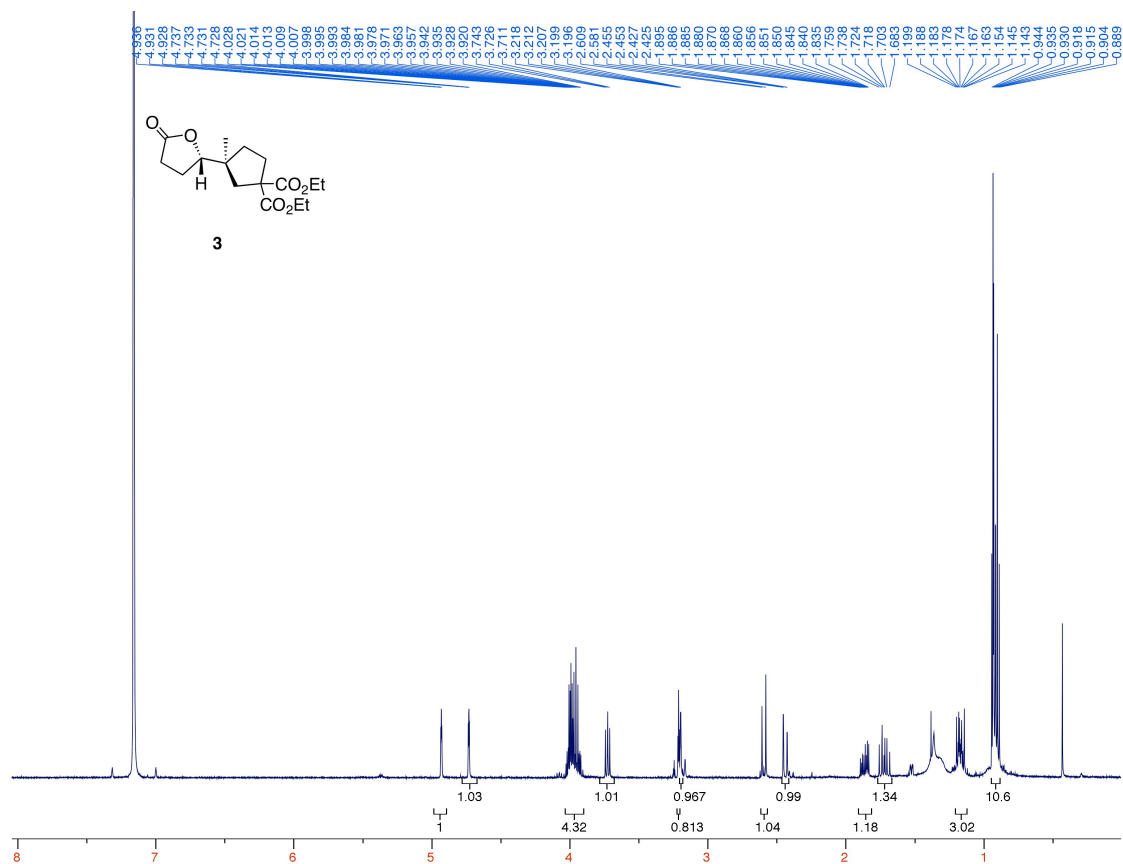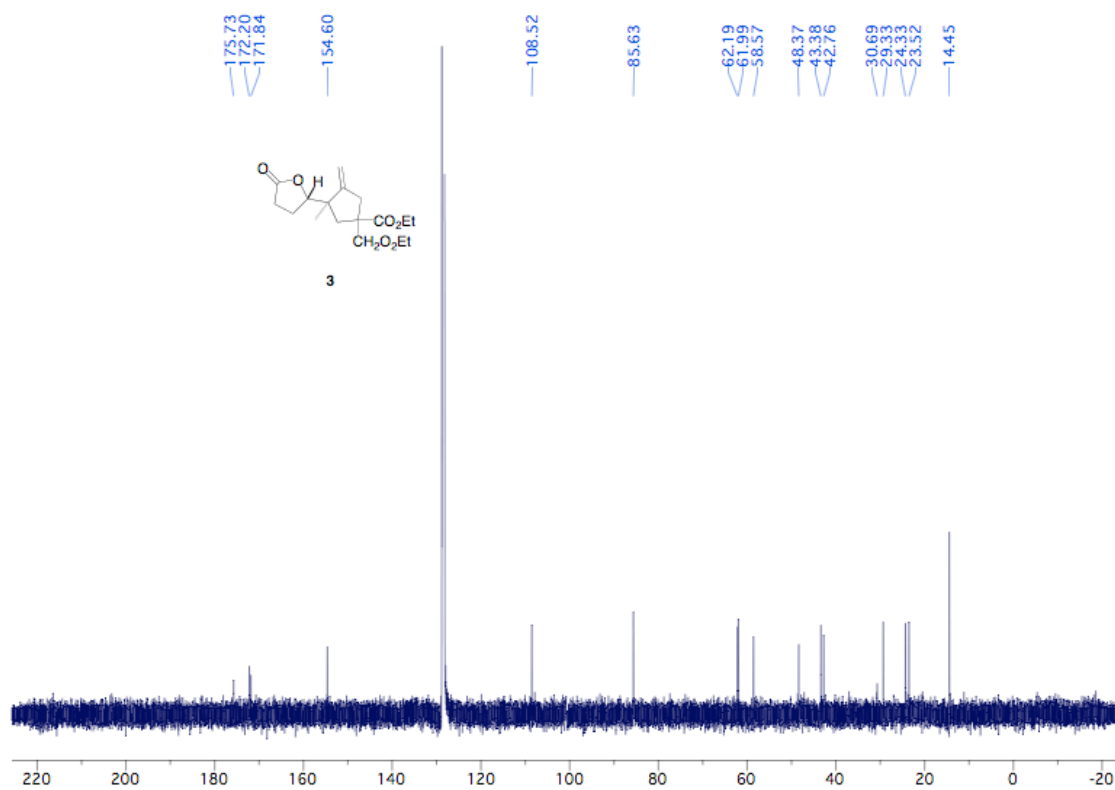

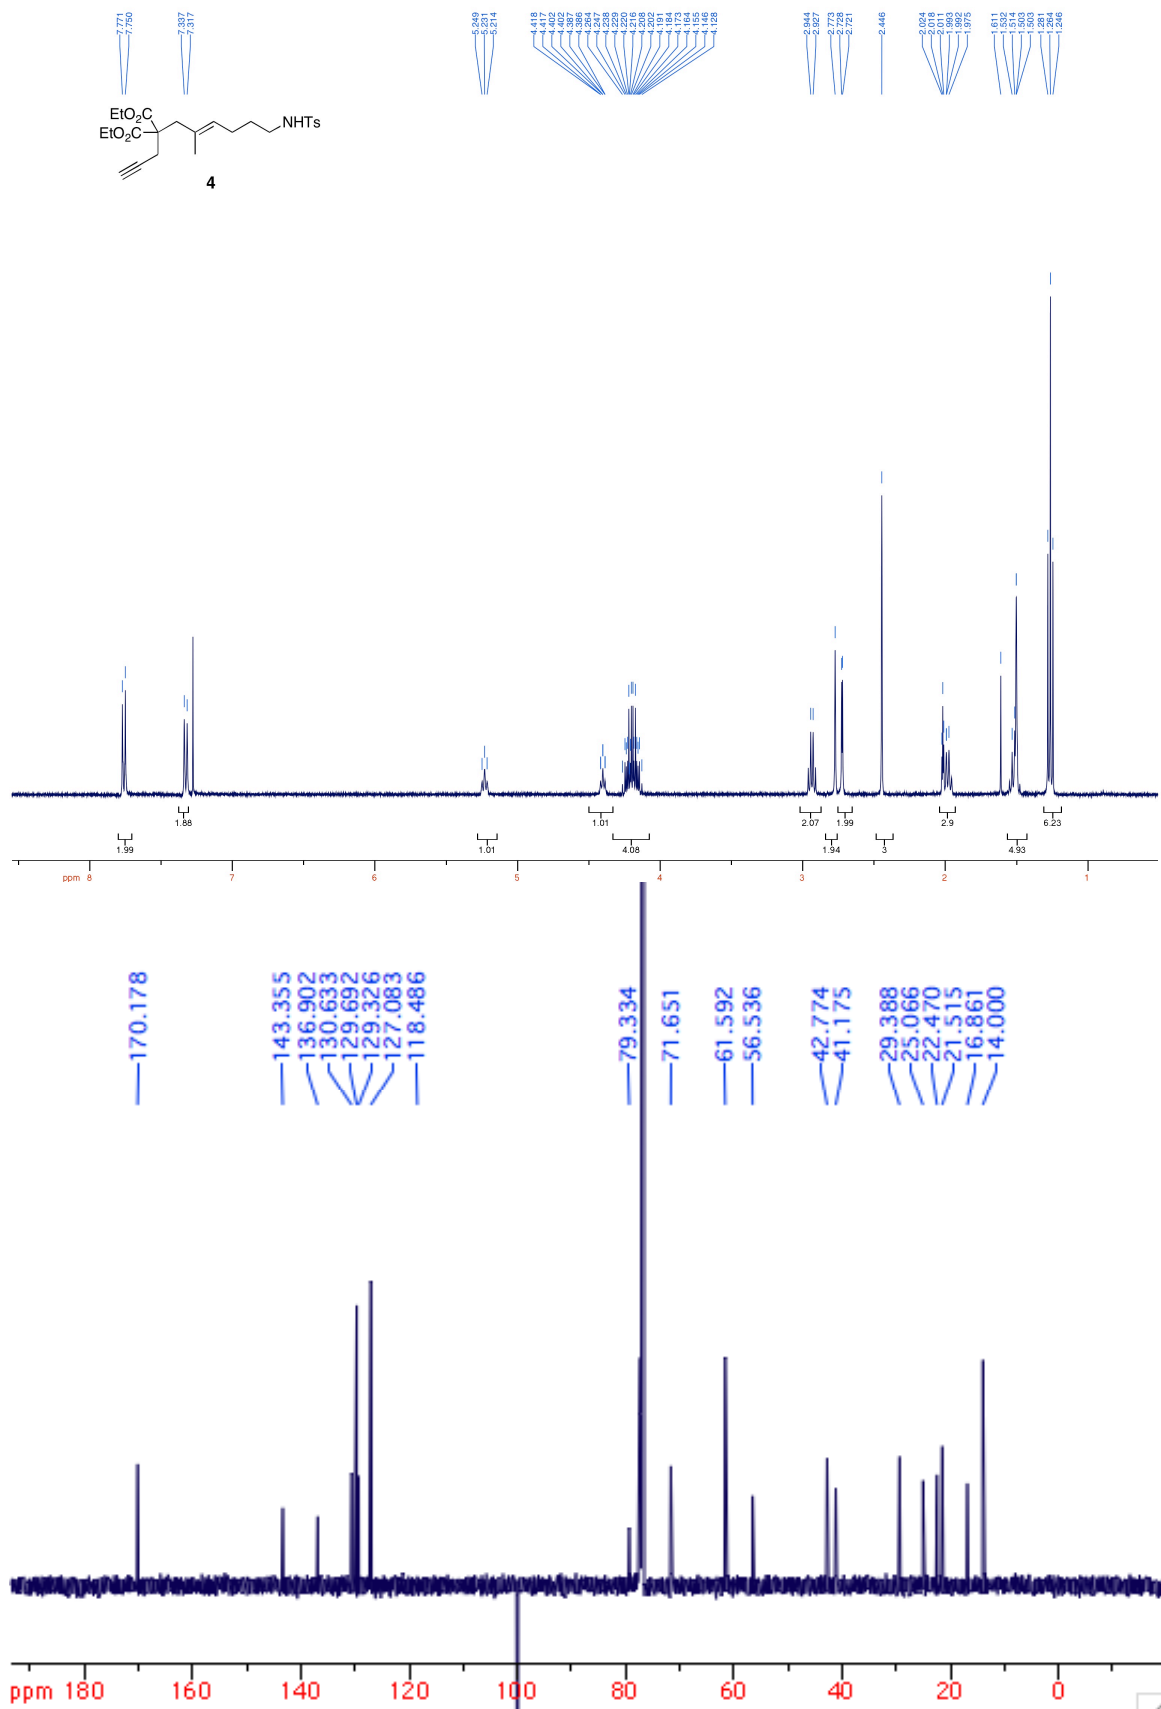

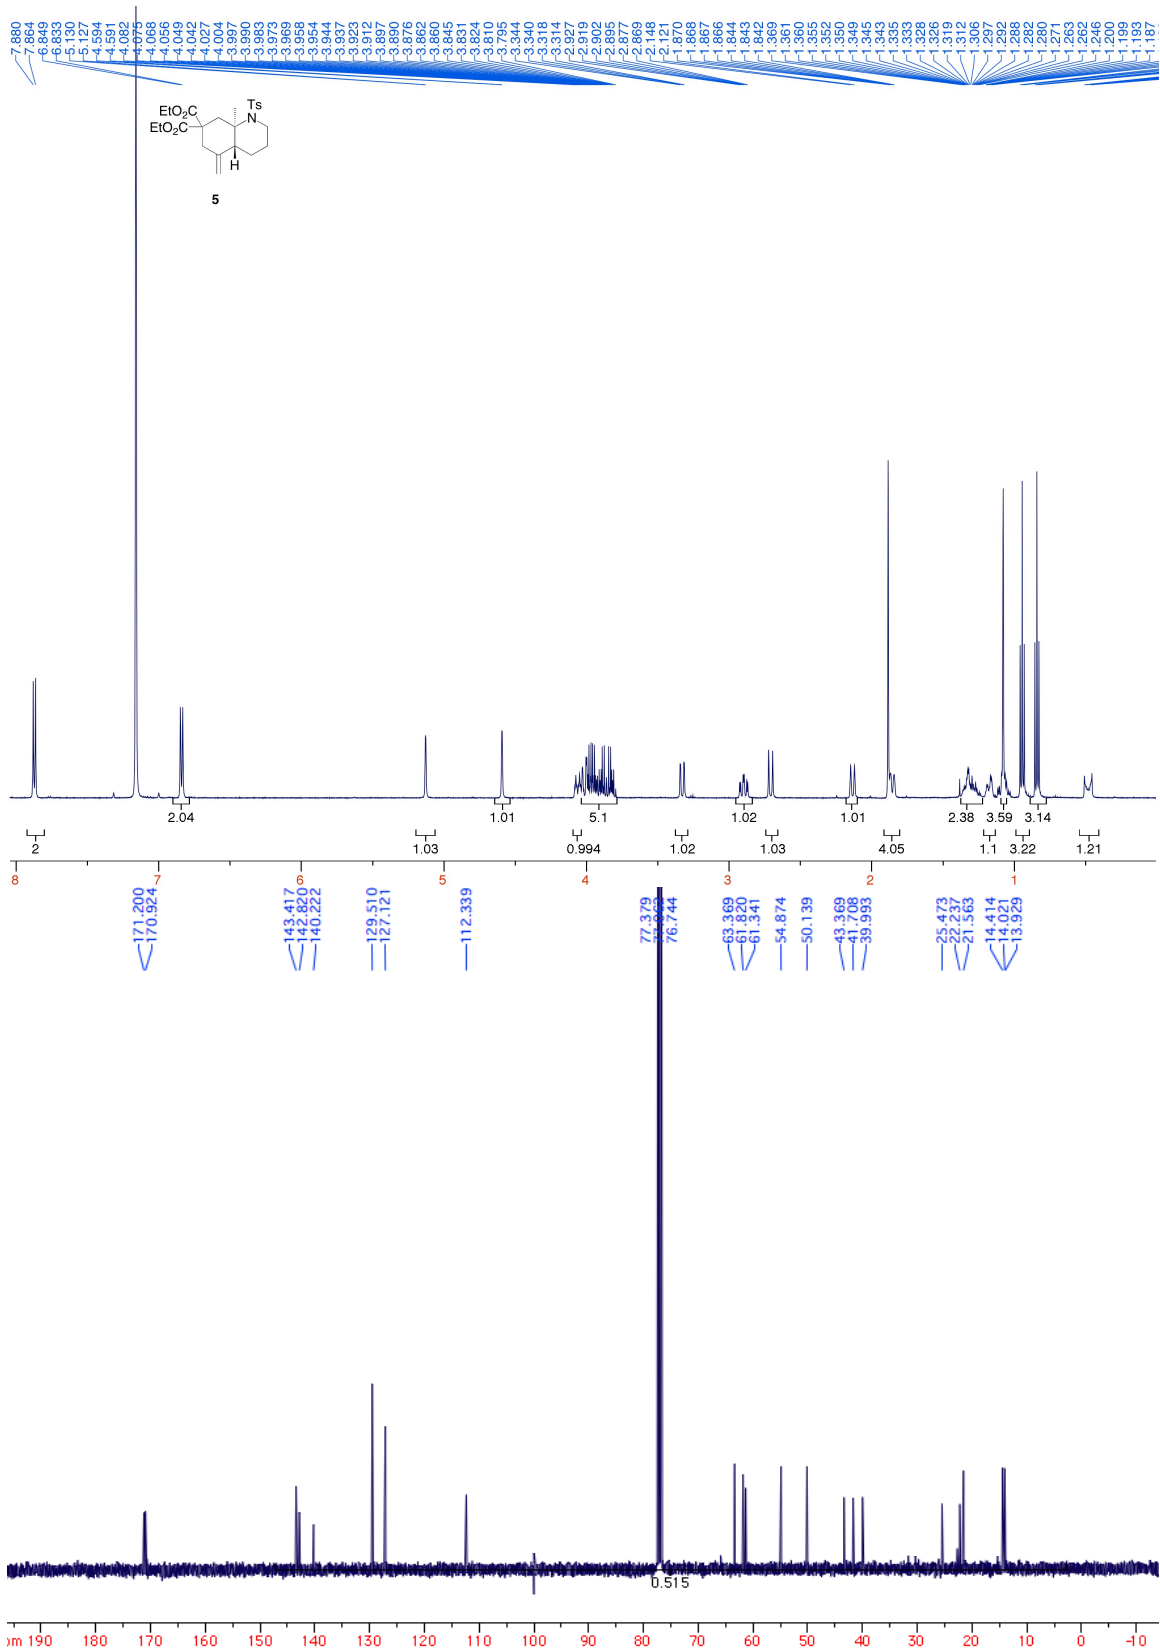

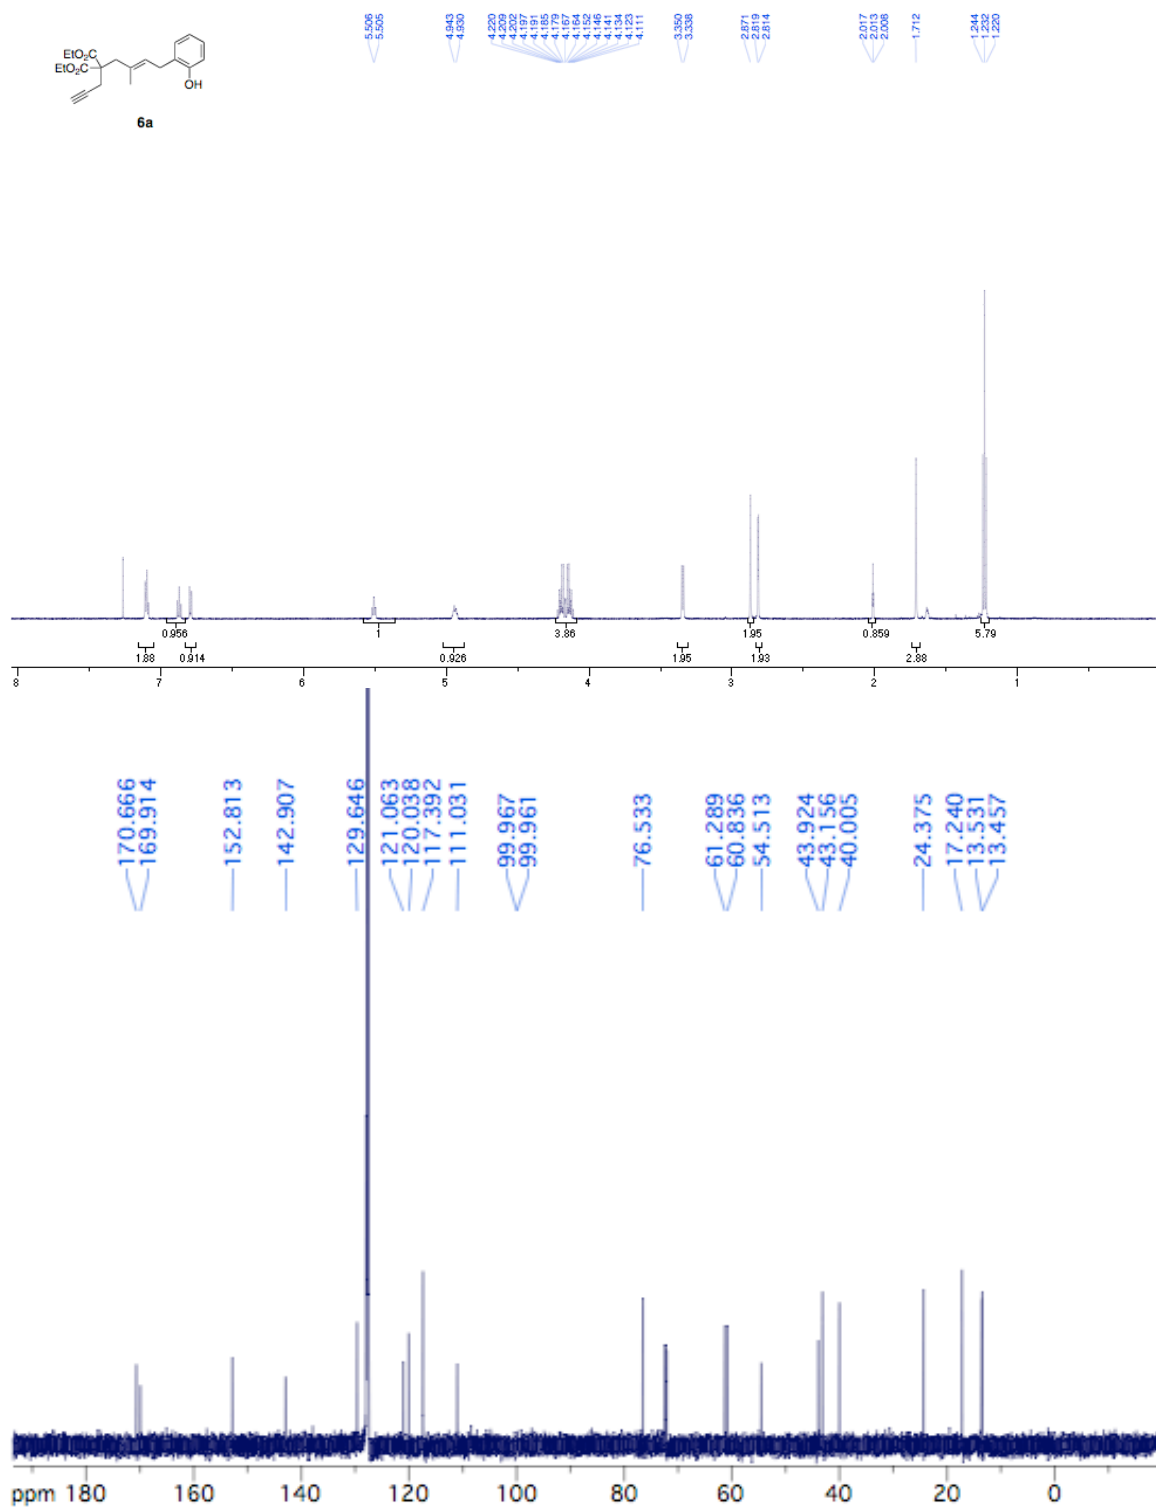

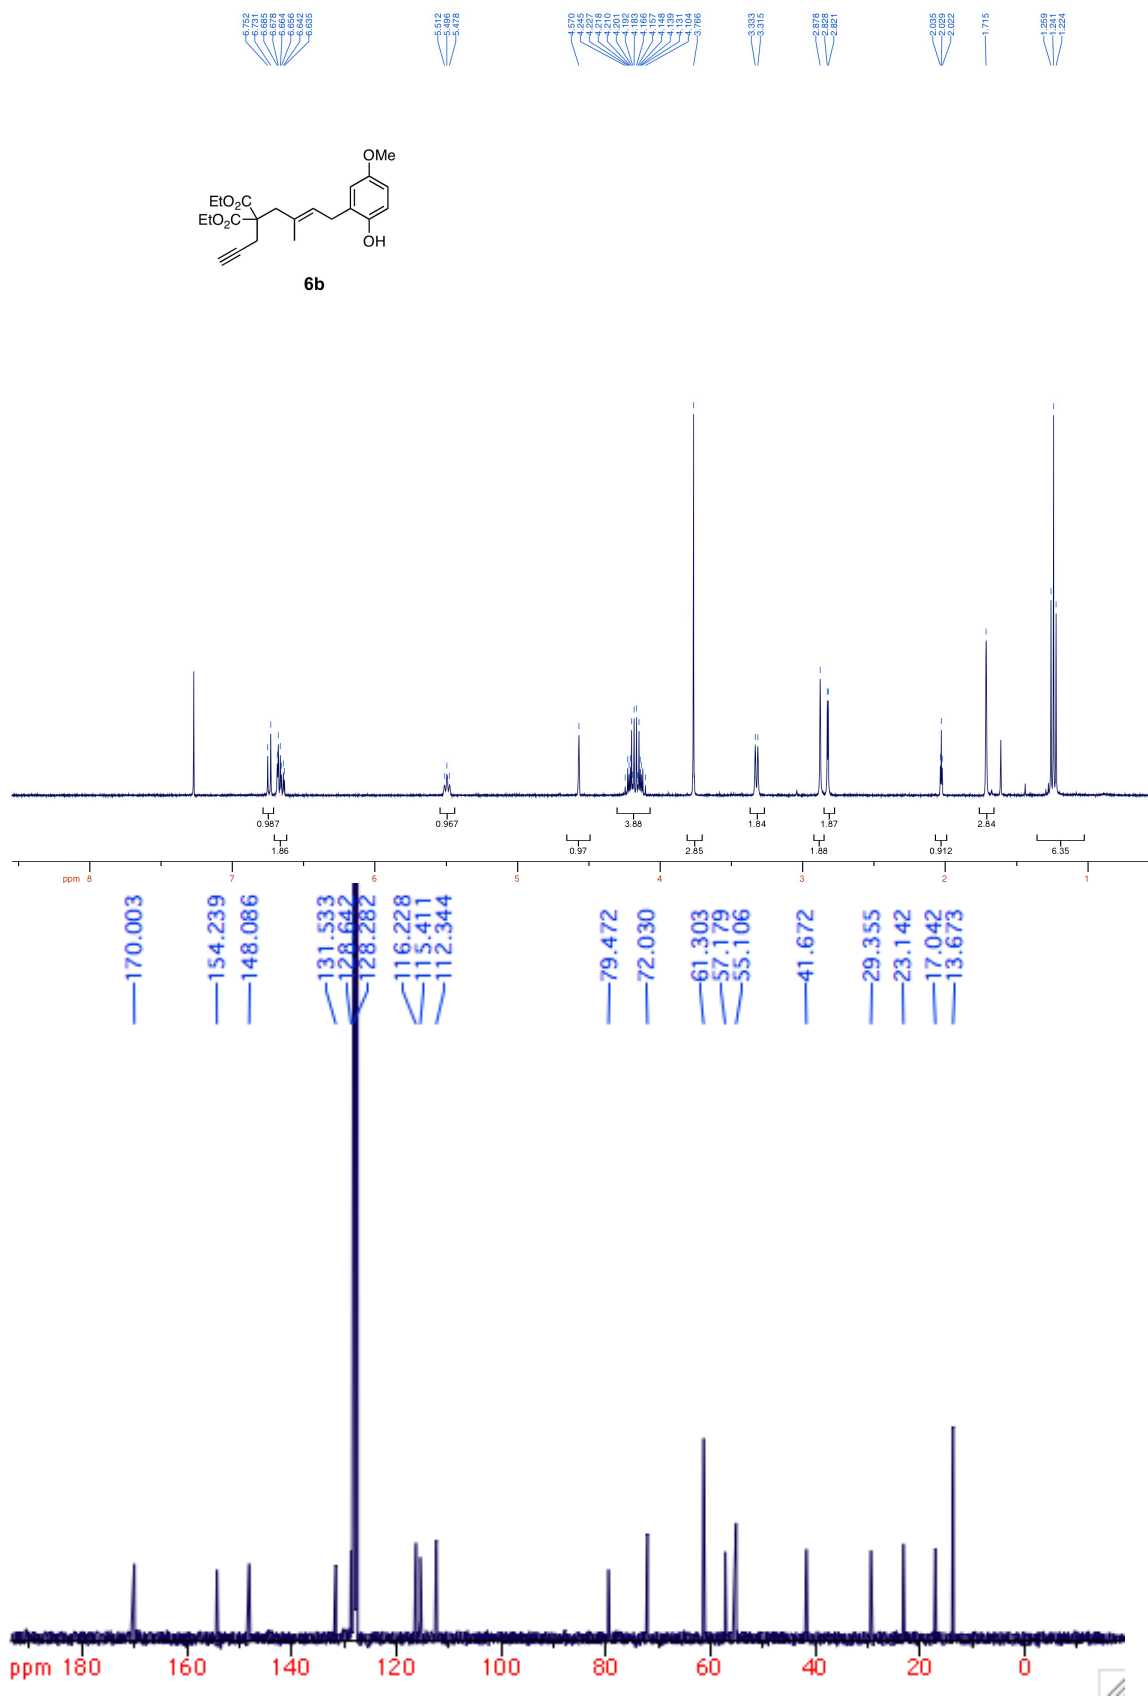

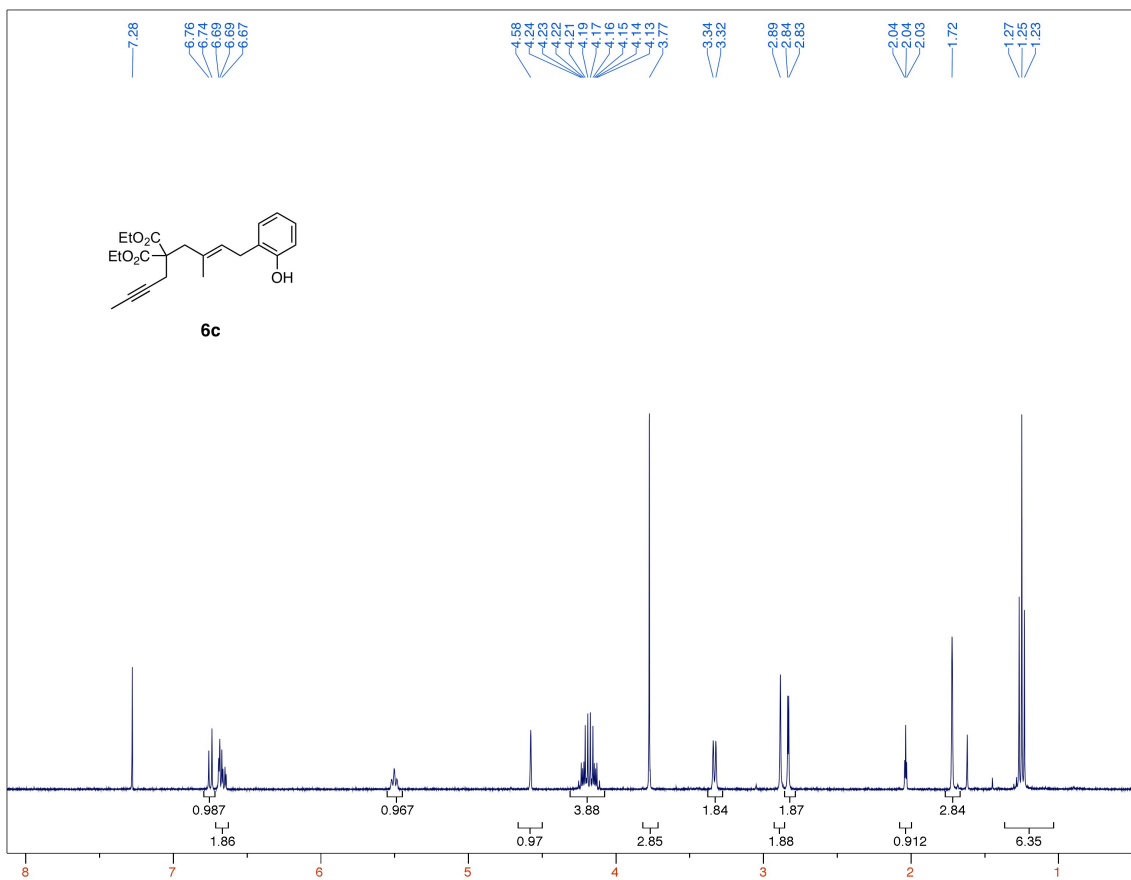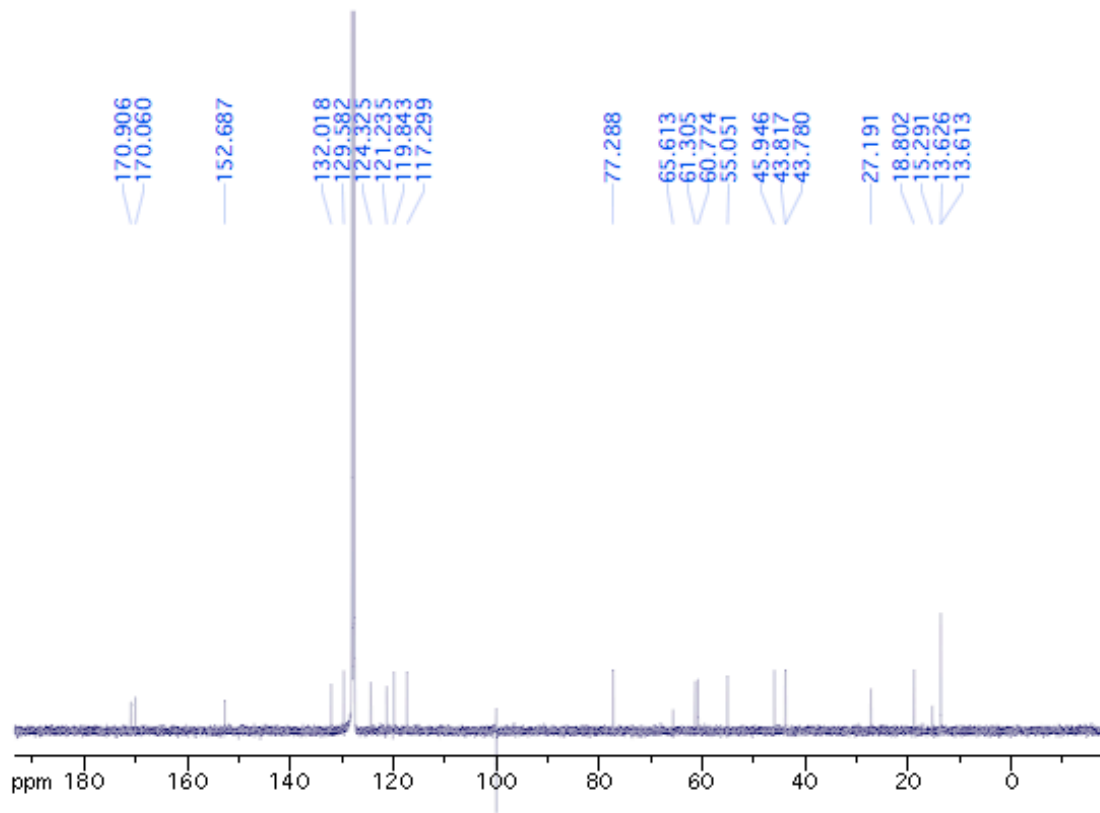

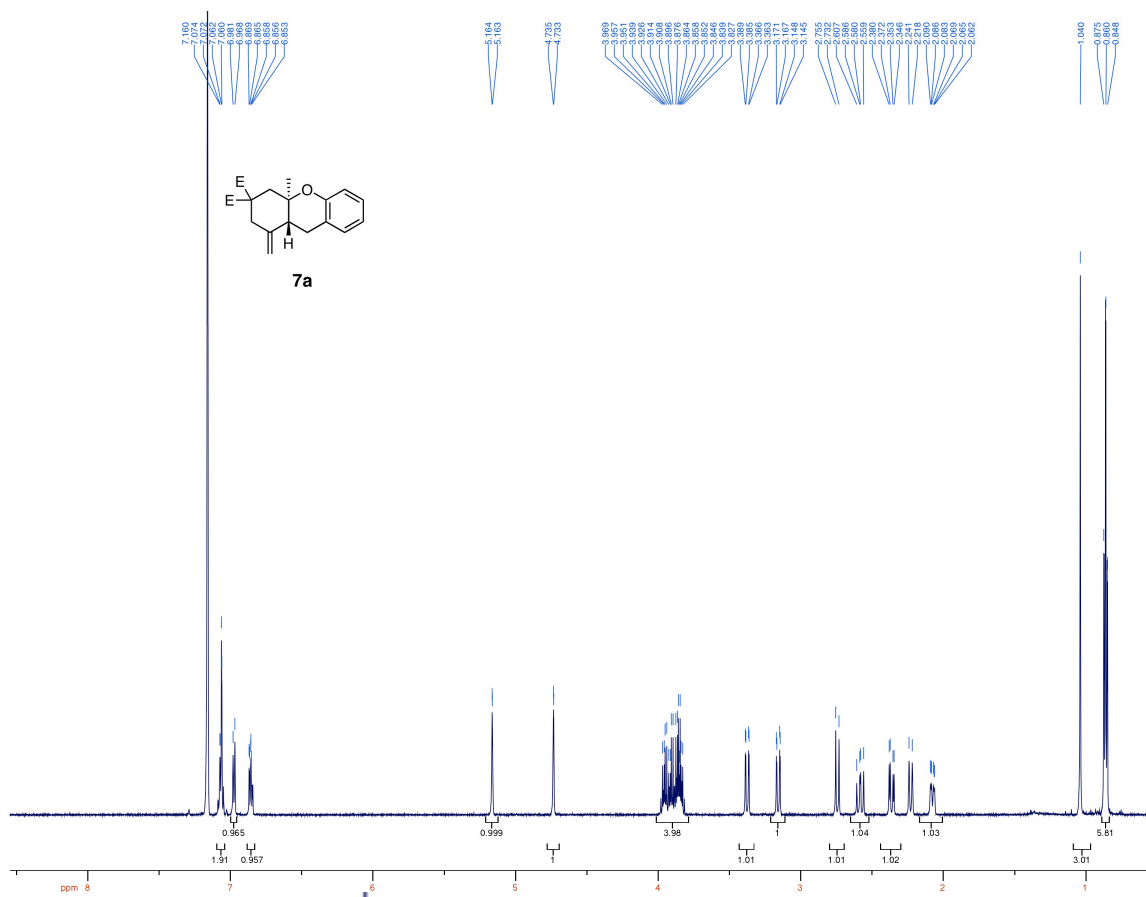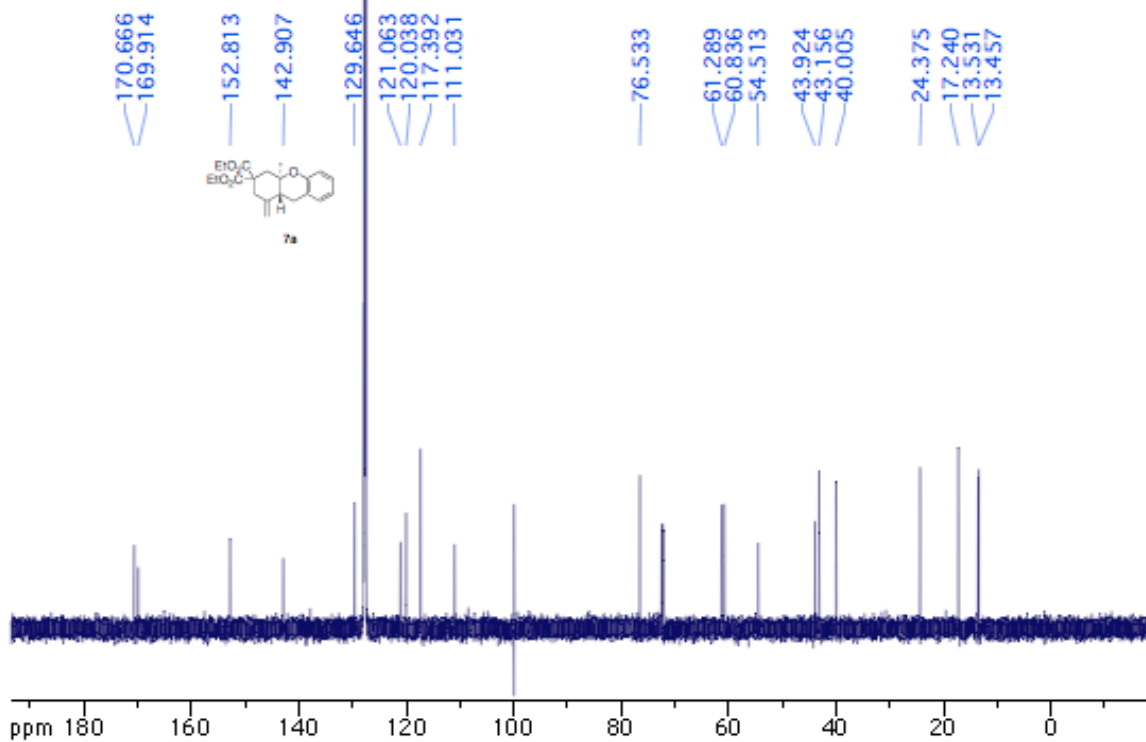

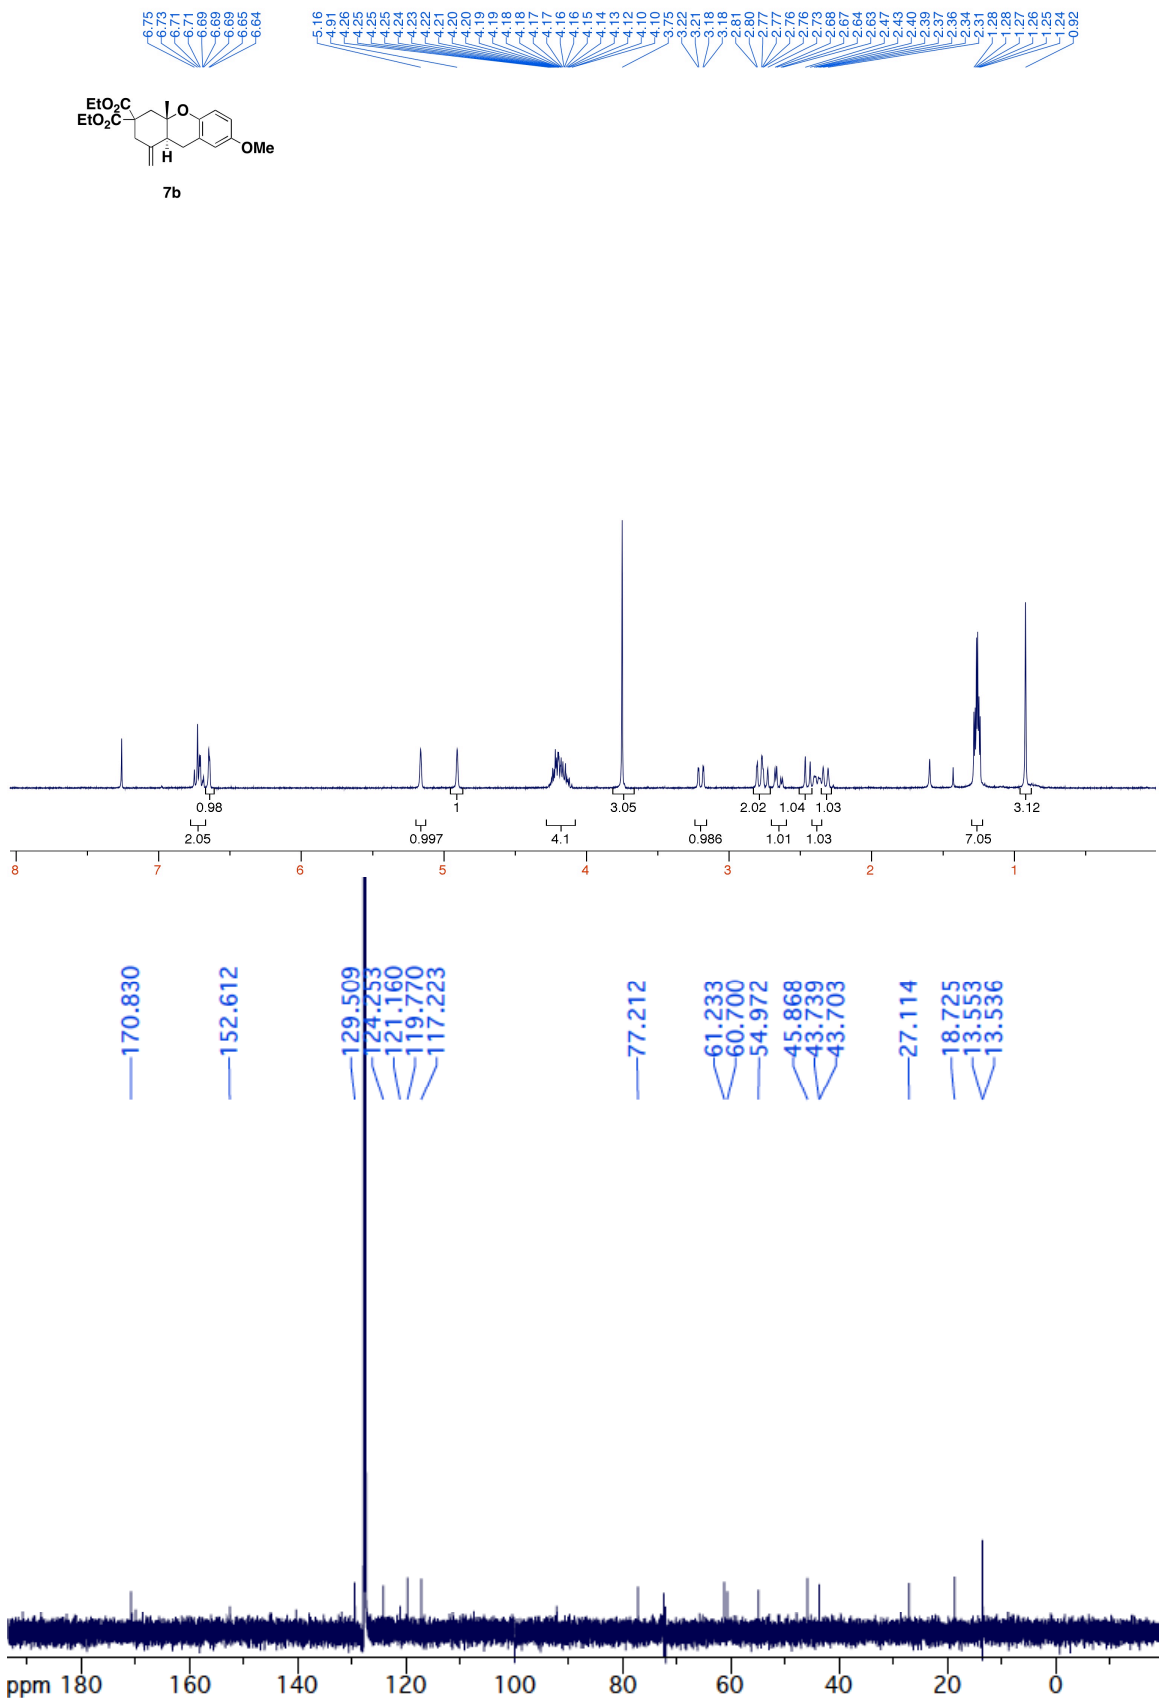



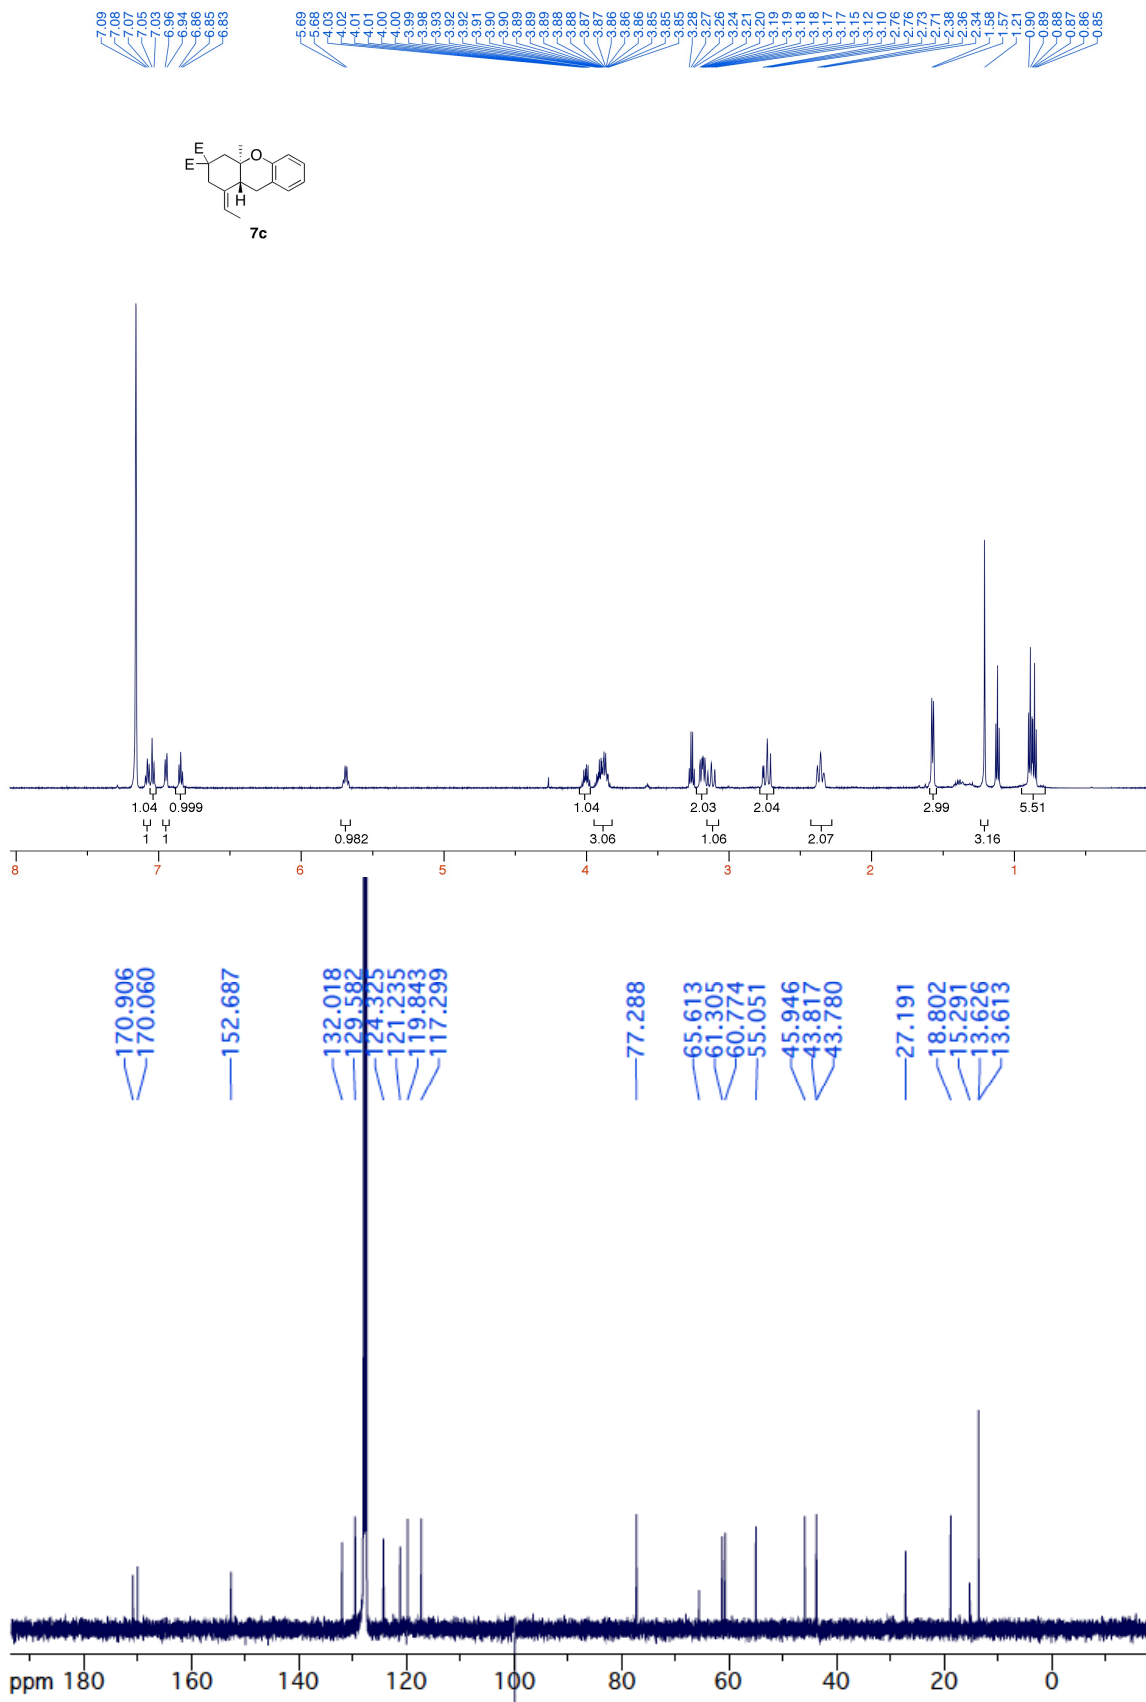

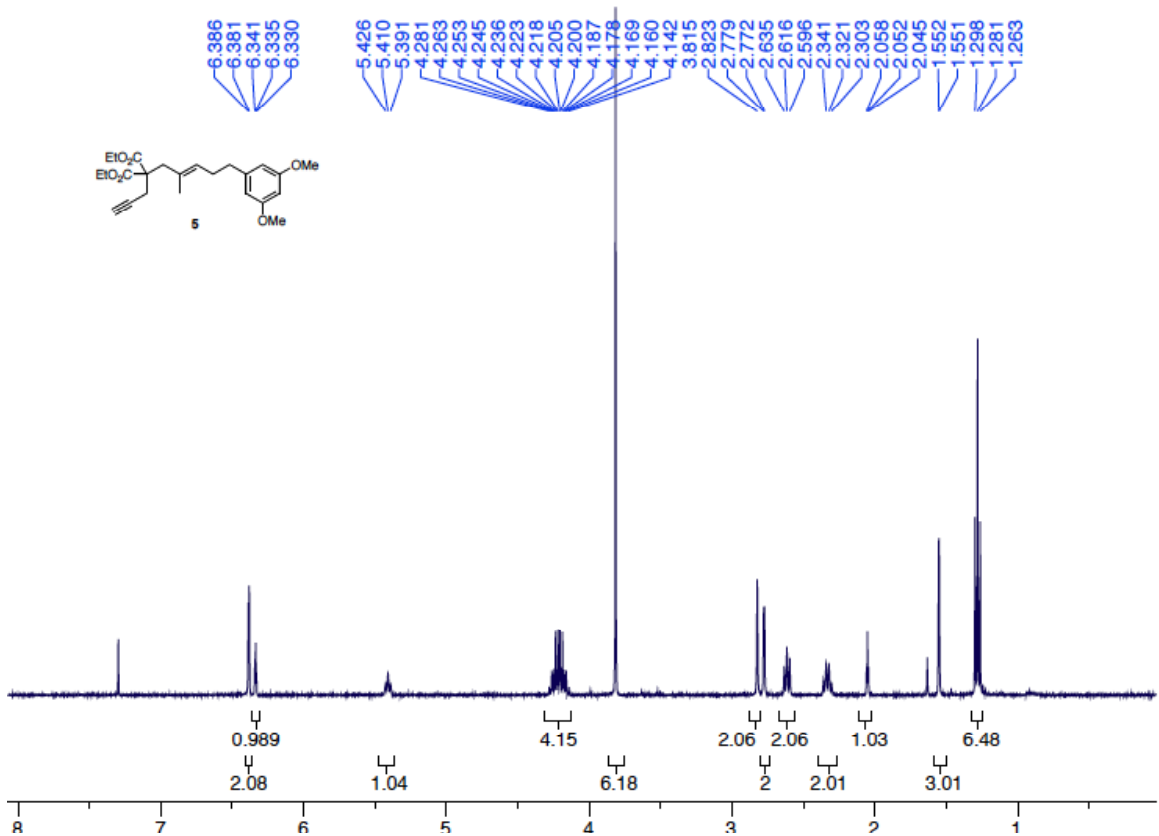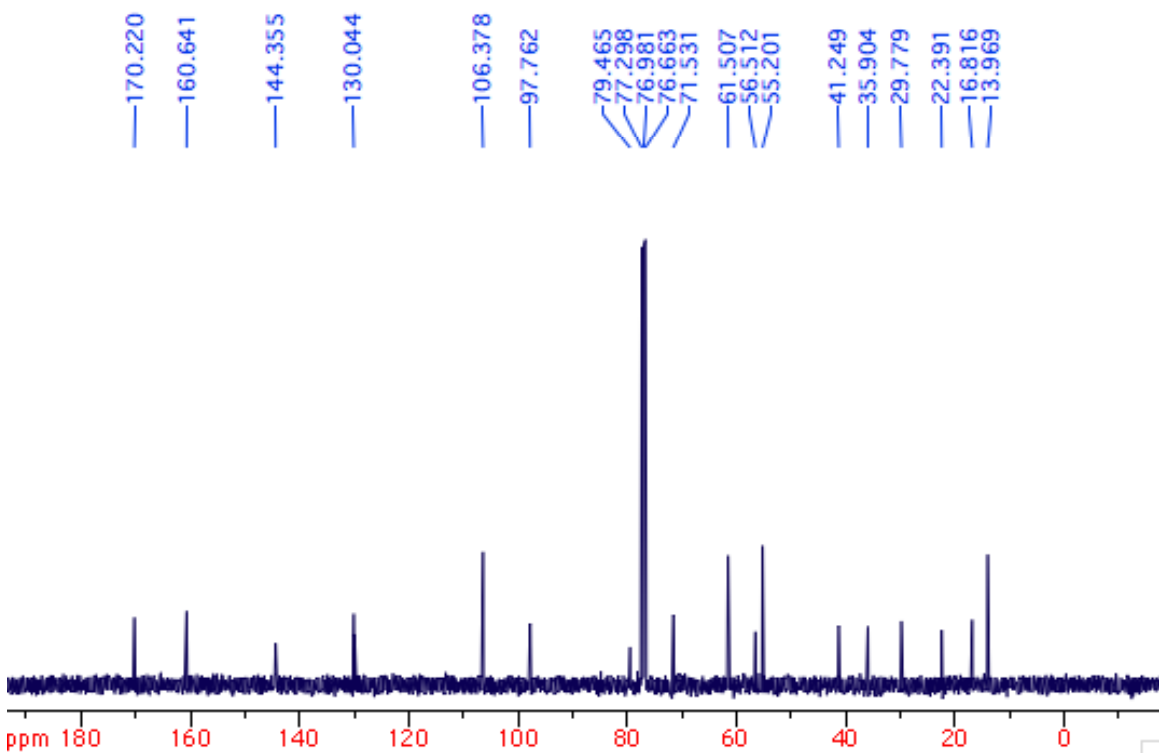

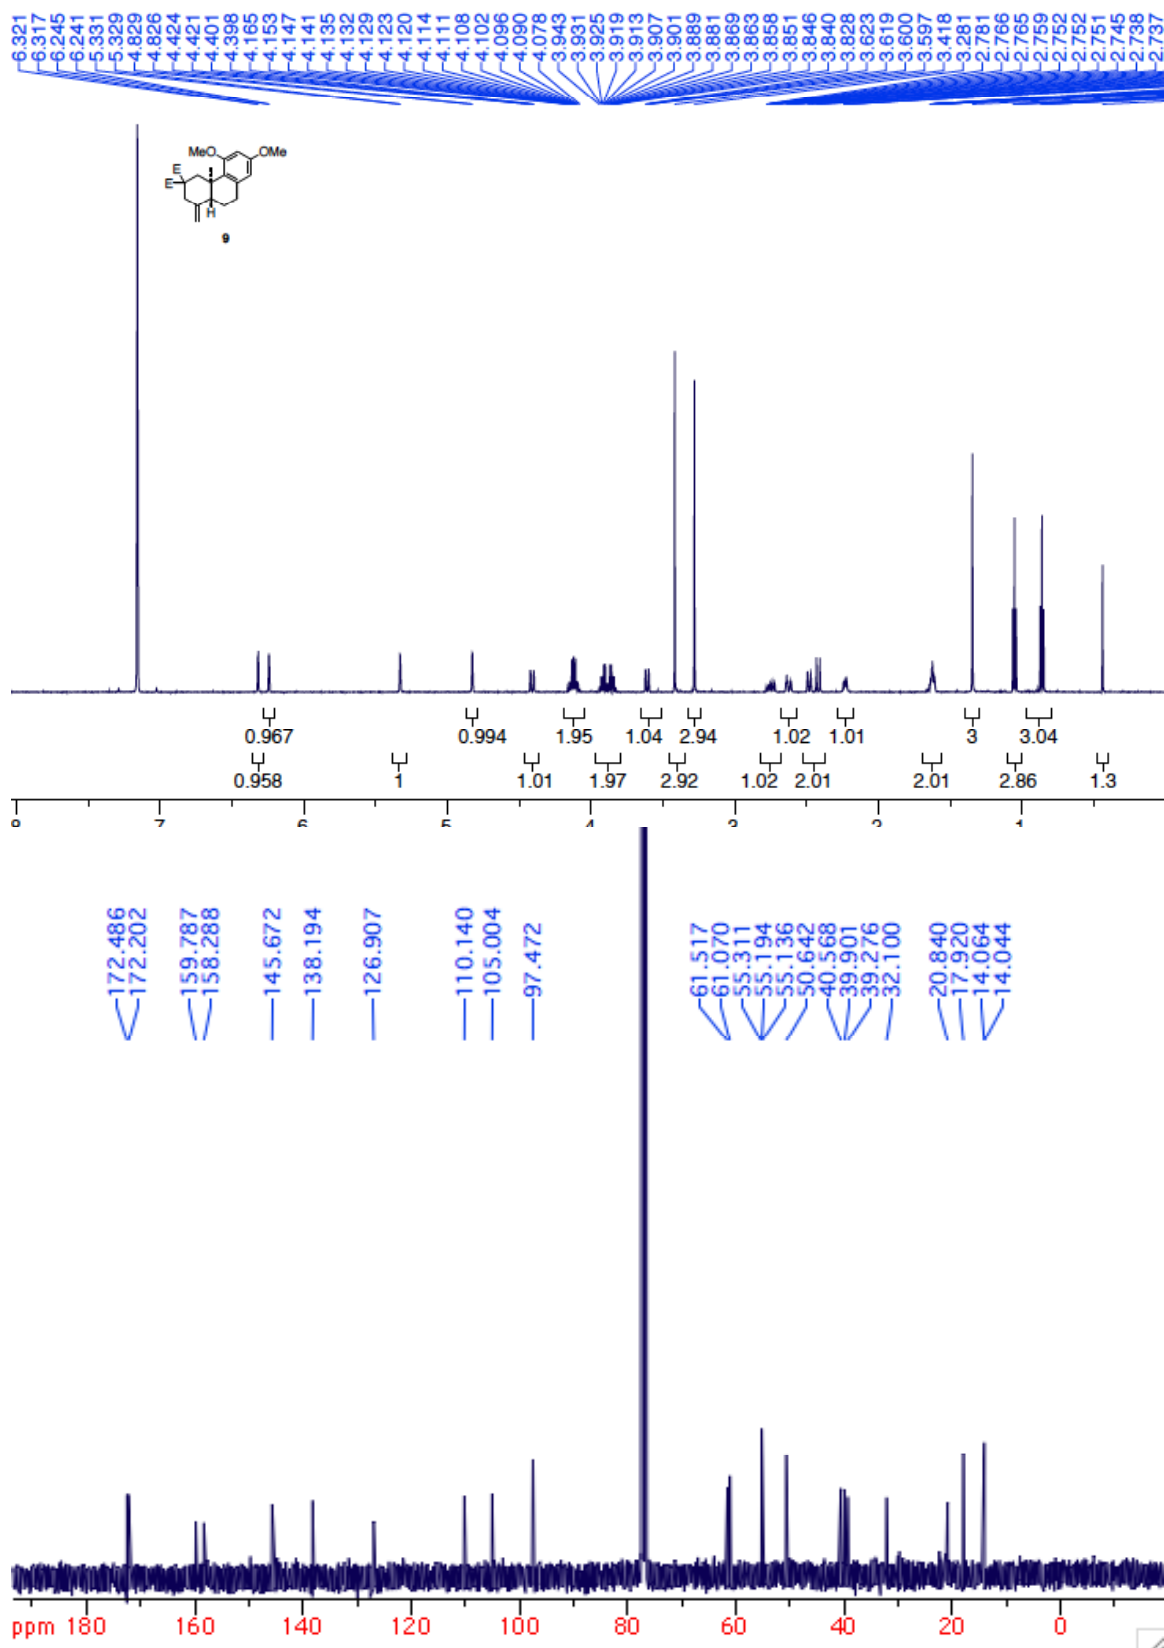

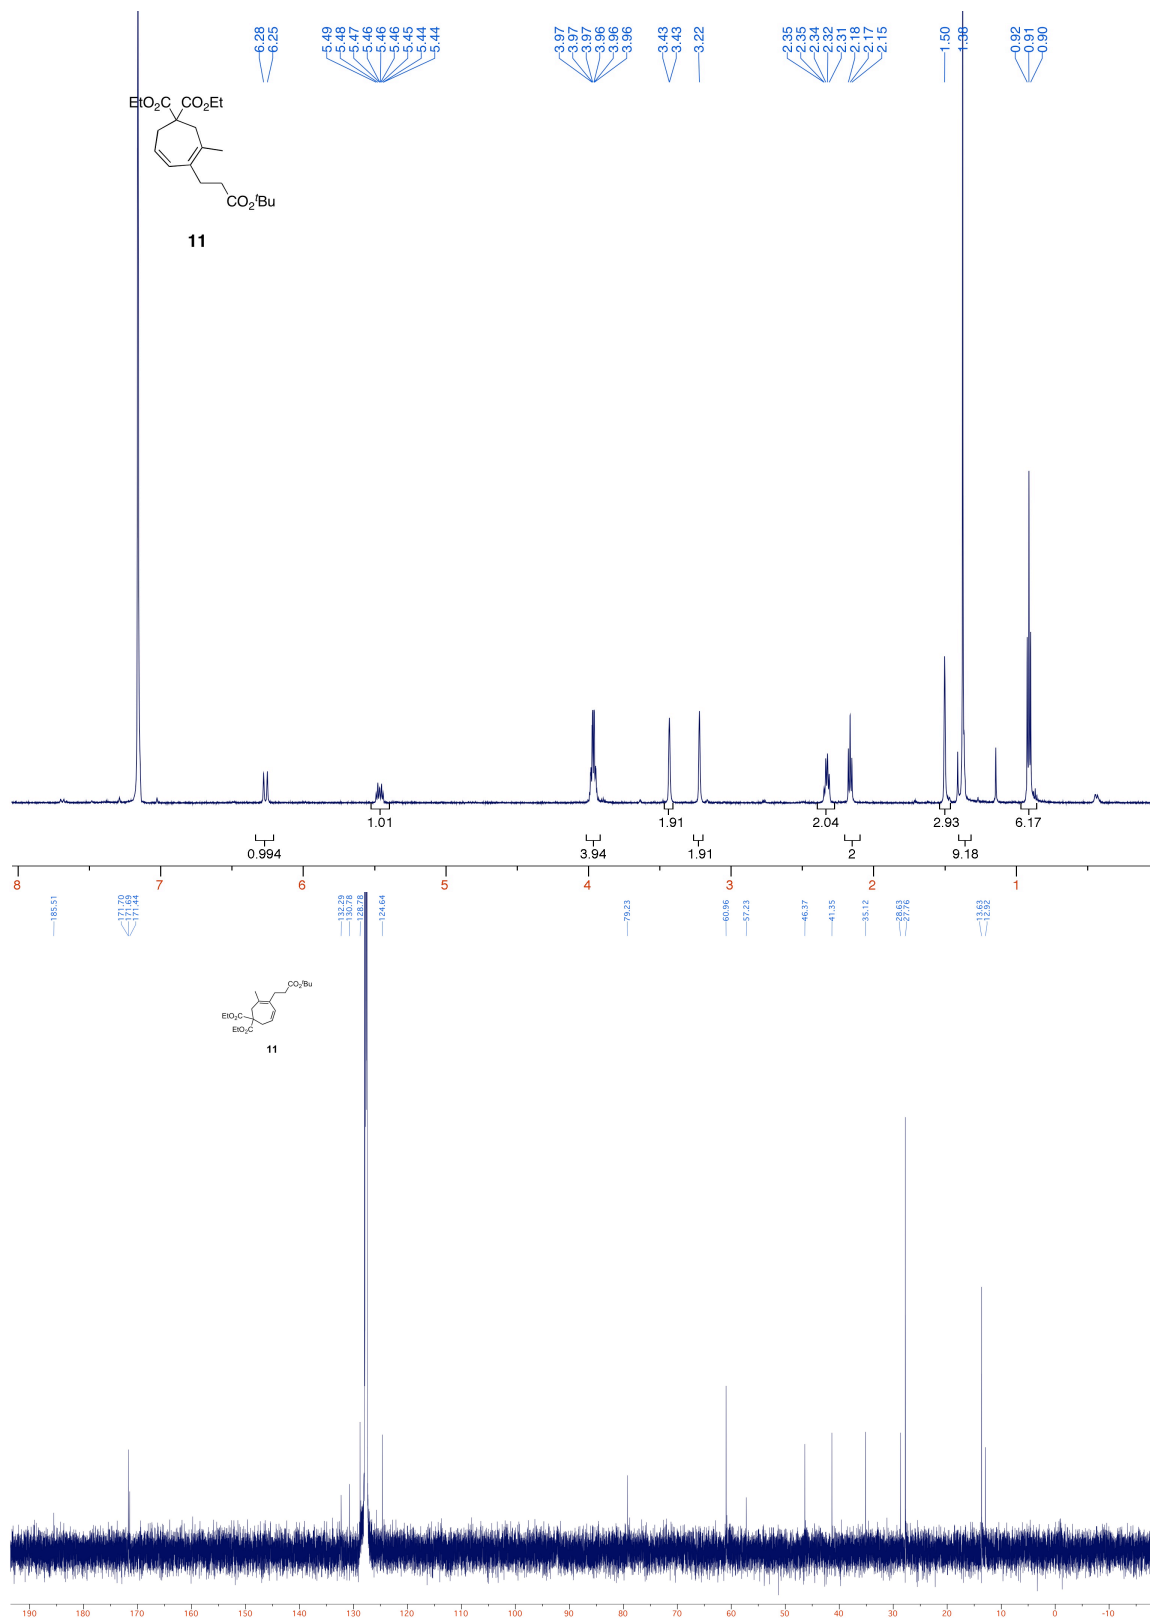

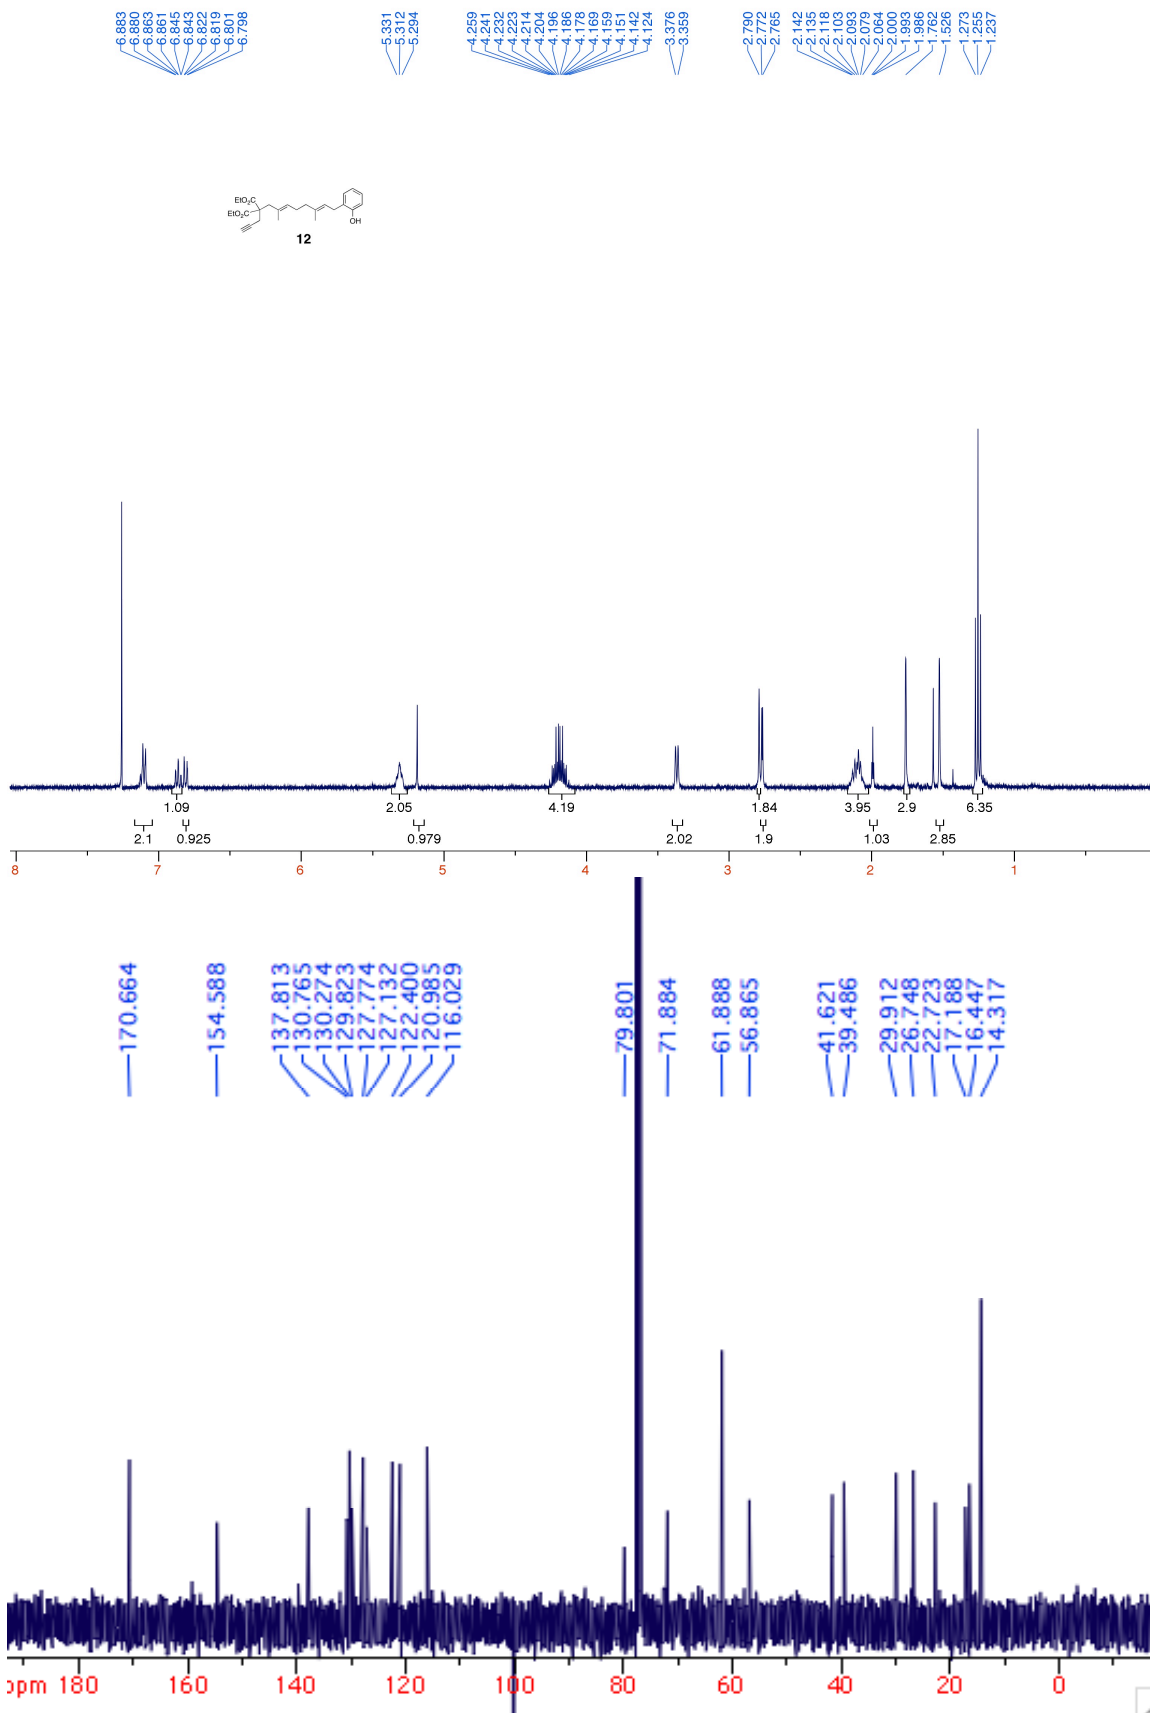

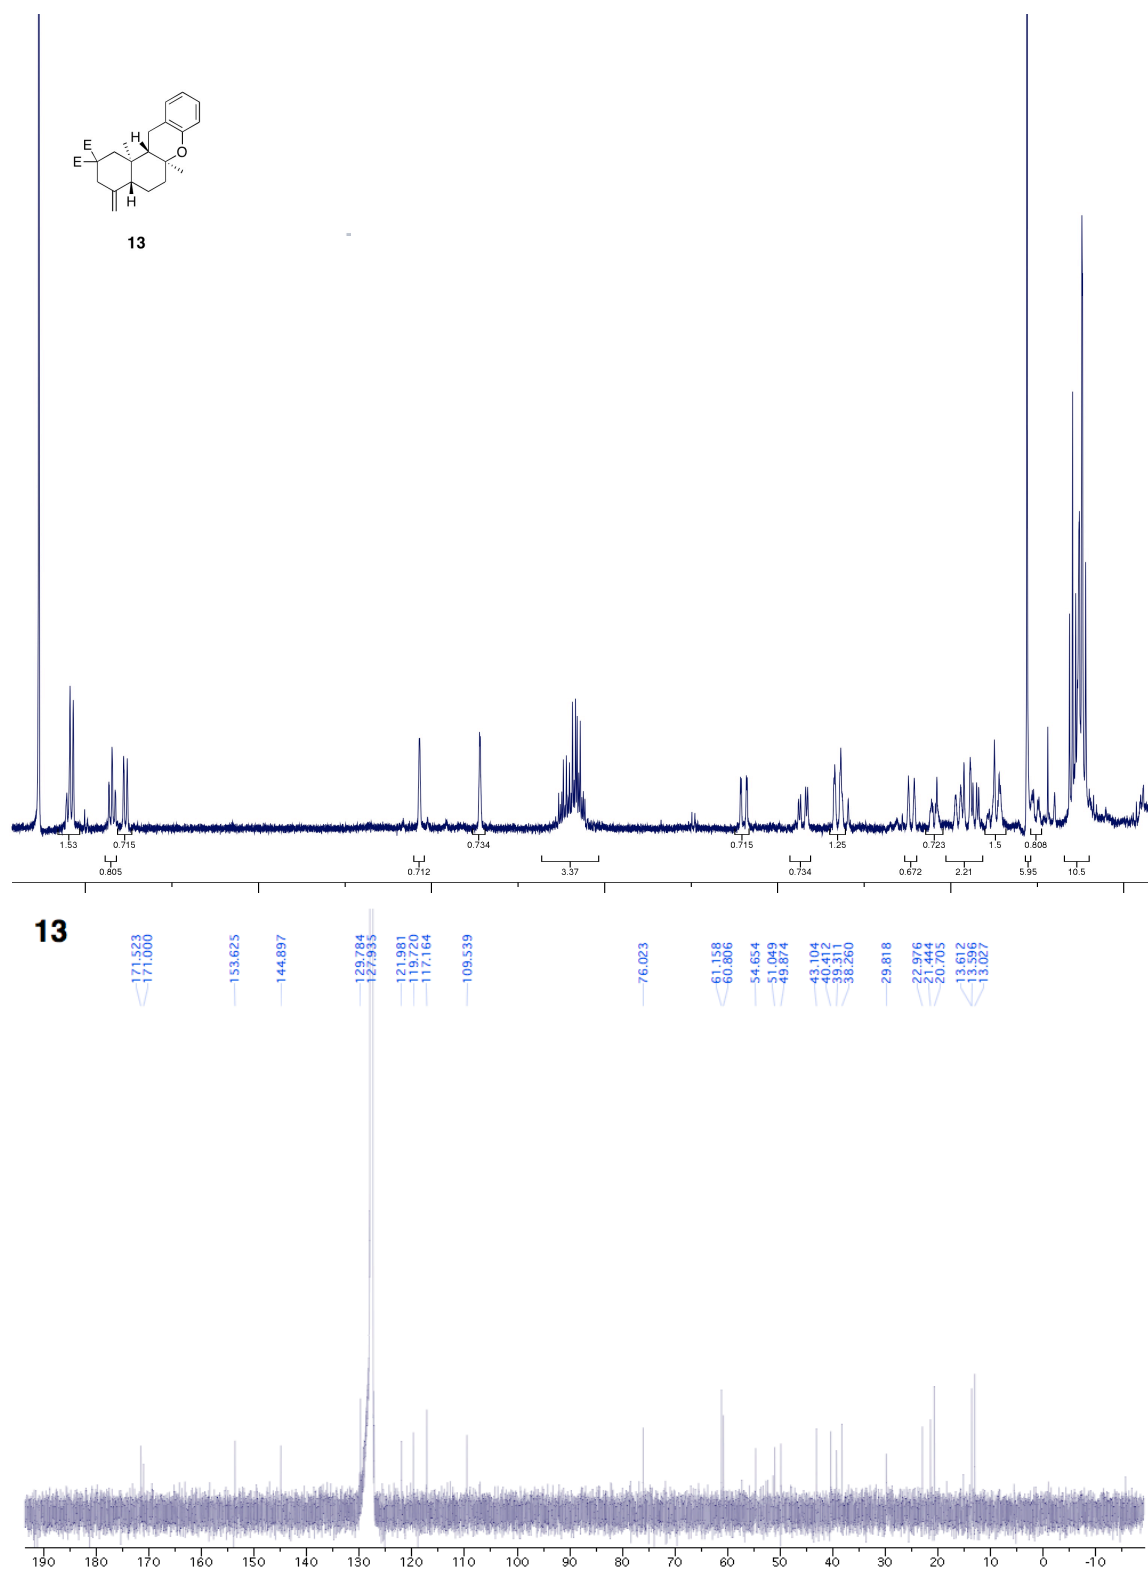

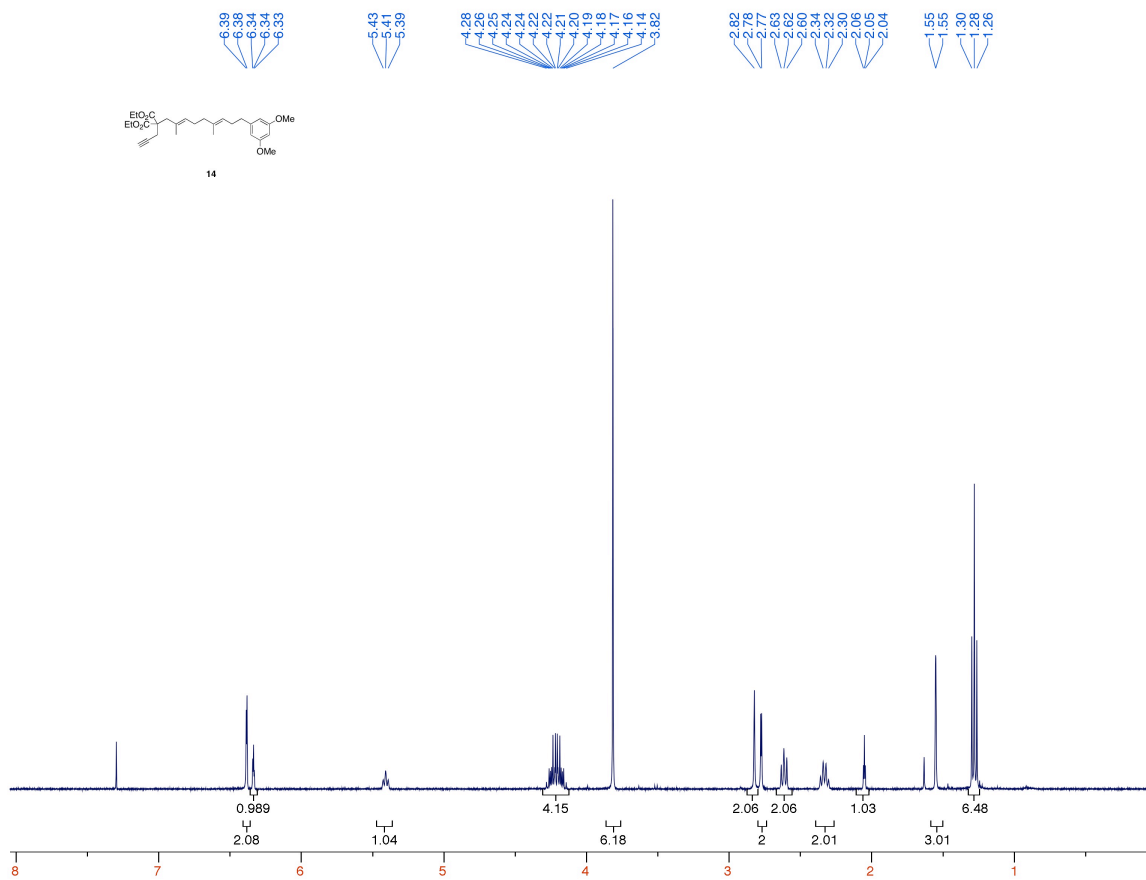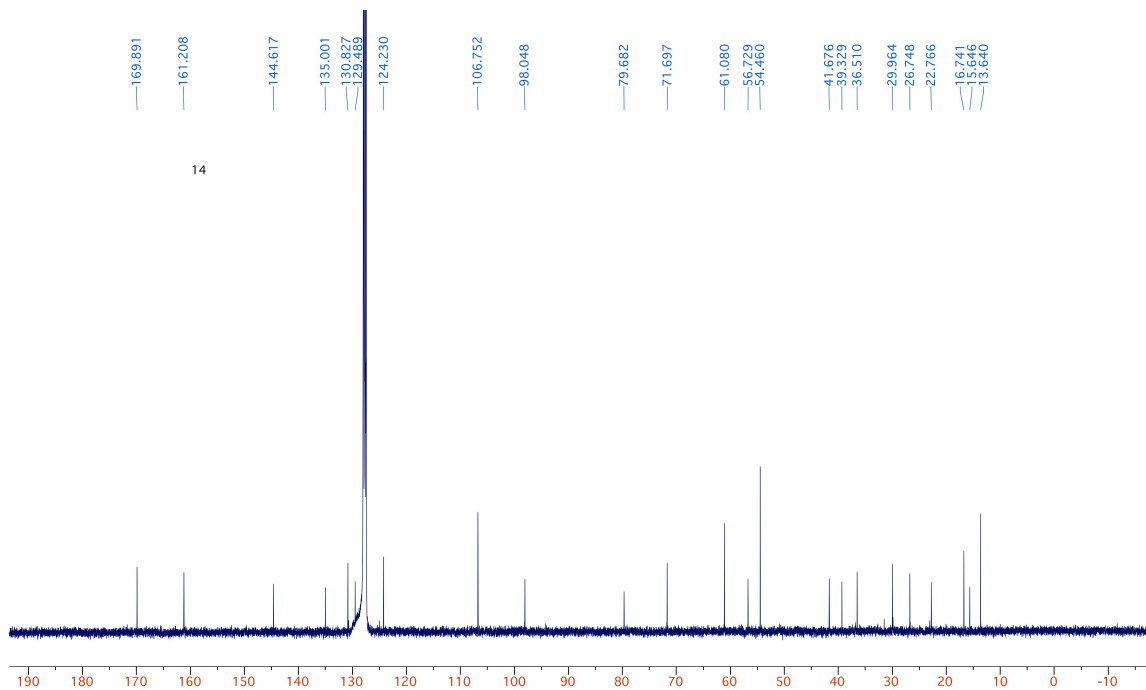

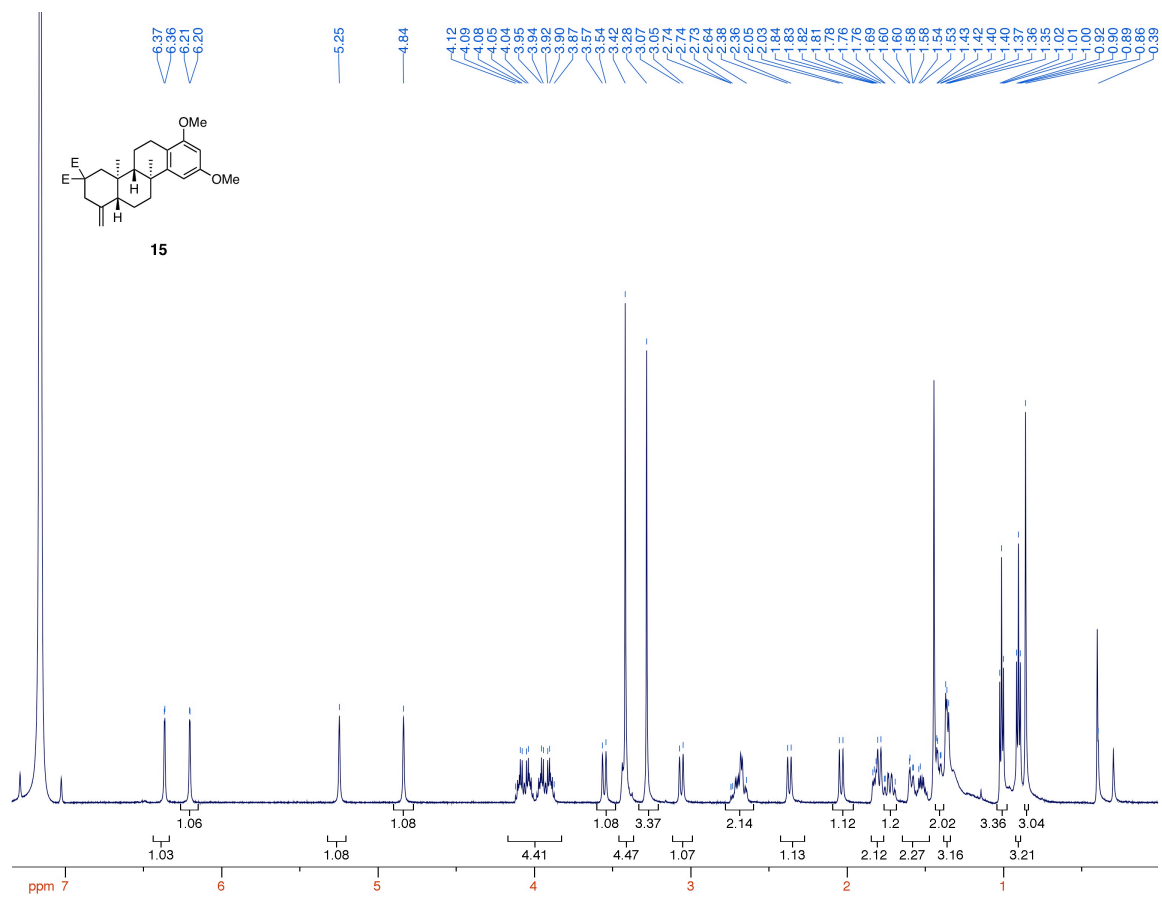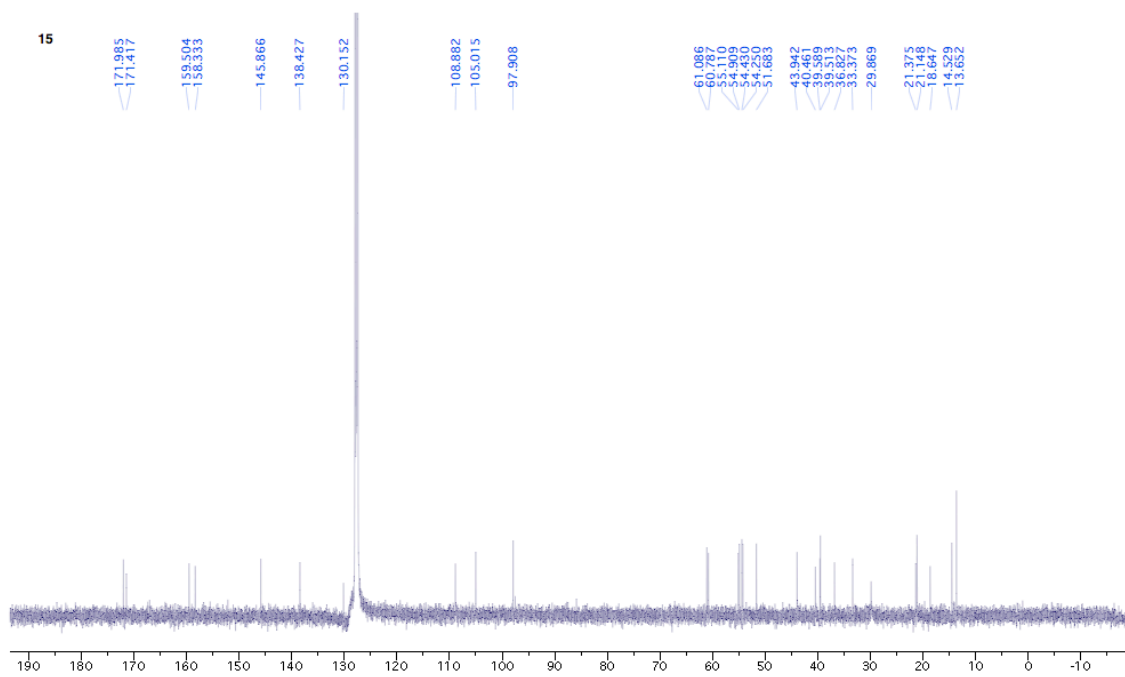



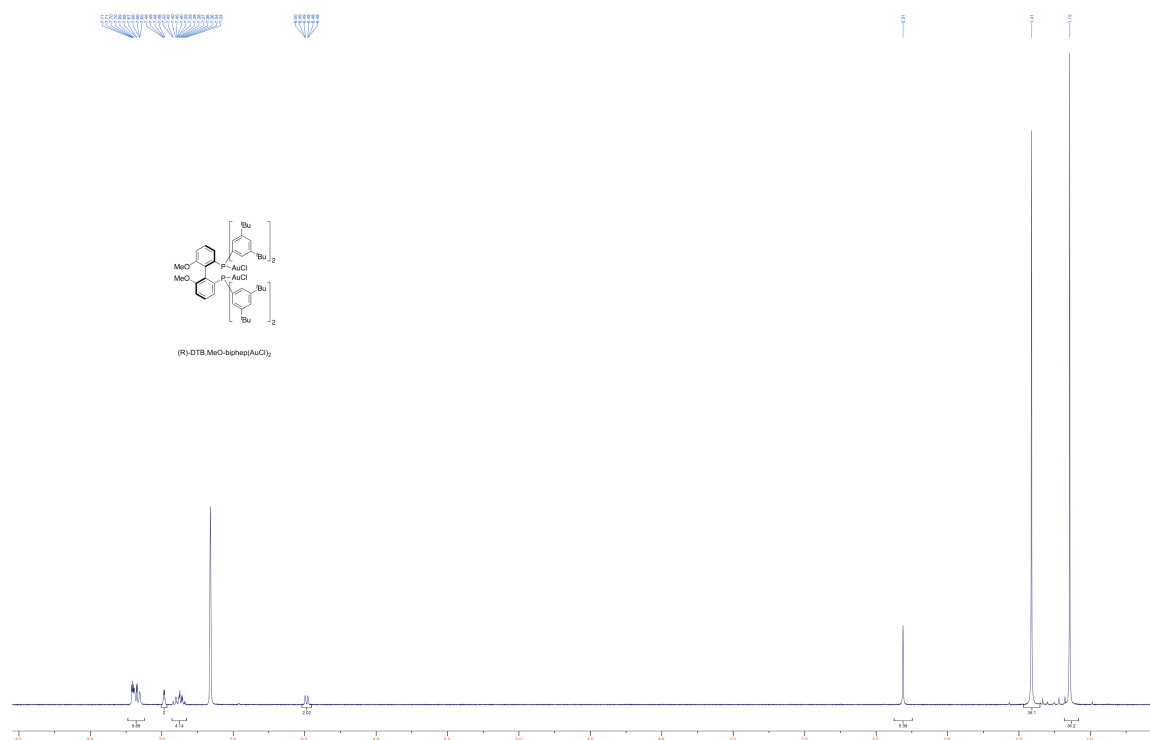

Supplement: NIHMS211076-supplement-1_si_001.pdf [file NIHMS211076-supplement-1_si_001.pdf]
